# The Hedgehog Co-Receptor BOC Differentially Regulates SHH Signaling During Craniofacial Development

Martha L. Echevarría-Andino<sup>1\*</sup> and Benjamin L. Allen<sup>1\*</sup>

<sup>1</sup>Department of Cell and Developmental Biology, University of Michigan, Ann Arbor, MI, 48109, USA

\*Correspondence: [mechevar@umich.edu](mailto:mechevar@umich.edu), [benallen@umich.edu](mailto:benallen@umich.edu)

Key words: Hedgehog, GAS1, CDON, BOC, craniofacial development, holoprosencephaly

Running title: BOC regulates HH signaling

## Summary statement

Here we identify dual, tissue-specific roles for the Hedgehog co-receptor BOC in both the promotion and antagonism of Hedgehog signaling during craniofacial development.

1 Abstract

2       The Hedgehog (HH) pathway controls multiple aspects of craniofacial development. HH ligands  
3 signal through the canonical receptor PTCH1, and three co-receptors– GAS1, CDON and BOC. Together,  
4 these co-receptors are required during embryogenesis to mediate proper HH signaling. Here we investigated  
5 the individual and combined contributions of GAS1, CDON and BOC to HH-dependent mammalian  
6 craniofacial development. Individual deletion of either *Gas1* or *Cdon* results in variable holoprosencephaly  
7 phenotypes, characterized by the failure to divide and form the telencephalon and midfacial structures. In  
8 contrast, we find that *Boc* deletion results in facial widening consistent with increased HH pathway activity.  
9 Additionally, the deletion of *Boc* in a *Gas1* null background partially rescues the craniofacial defects  
10 observed in *Gas1* single mutants; a phenotype that persists over developmental time. This contrasts with  
11 HH-dependent phenotypes in other tissues that significantly worsen following combined deletion of *Gas1*  
12 and *Boc*. Mechanistically, BOC selectively restricts neural crest-derived mesenchymal proliferation.  
13 Together, these data indicate that BOC acts as a multi-functional regulator of HH signaling during  
14 craniofacial development, alternately promoting or restraining HH pathway activity in a tissue-specific  
15 fashion.  
16

## 17 Introduction

18 Hedgehog (HH) signaling regulates the patterning and growth of nearly every tissue in the body  
19 (Briscoe and Thérond, 2013; McMahon et al., 2003). Aberrant HH pathway activity results in severe birth  
20 defects including Holoprosencephaly (HPE), a defect characterized by the failure of the division of the  
21 embryonic forebrain into two cerebral hemispheres (Muenke and Beachy, 2000). HPE is one of the most  
22 common birth defects in humans, estimated to affect as many as 1 in 250 embryos (Hong and Krauss, 2018).  
23 The clinical manifestations of HPE are highly heterogeneous, consisting of a wide phenotypic spectrum of  
24 defects (Schachter and Krauss, 2008). Notably, 80% or more of HPE cases will display facial defects in  
25 addition to forebrain malformations (Schachter and Krauss, 2008).

26 Multiple mutations associated with developmental signaling pathways such as HH, have been  
27 identified in human HPE patients (Roessler and Muenke, 2010). Specifically, mutations in *Sonic Hedgehog*  
28 (*SHH*) account for 6%-8% of sporadic HPE (Roessler et al., 2009). During craniofacial development *Shh*  
29 regulates the establishment of forebrain identity, and patterns the face primordia (Schachter and Krauss,  
30 2008). Moreover, disruption of *Shh* in mice results in abnormal dorsoventral patterning in the neural tube,  
31 defective axial skeleton formation and alobar HPE (Chiang et al., 1996).

32 SHH ligands signal through the twelve-pass transmembrane receptor Patched (PTCH1), (Marigo et  
33 al., 1996). However, SHH also binds three co-receptors, growth arrest specific 1 (GAS1), CAM-  
34 related/downregulated by oncogenes (CDON) and brother of CDON (BOC) (Allen et al., 2011; Allen et al.,  
35 2007; Beachy et al., 2010; Izzi et al., 2011; Lee et al., 2001; McLellan et al., 2008; Tenzen et al., 2006; Yao  
36 et al., 2006; Zhang et al., 2011; Zhang et al., 2006). CDON and BOC are structurally similar members of the  
37 immunoglobulin superfamily that are conserved from *Drosophila* to mammals (Beachy et al., 2010; Kang et  
38 al., 1997; Kang et al., 2002; Lum et al., 2003). GAS1 is a vertebrate-specific, GPI-anchored protein with  
39 structural resemblance to GDNF receptors (Cabrera et al., 2006). In the absence of SHH ligand, PTCH1  
40 inhibits the activity of the GPCR-like protein Smoothed (SMO). SHH ligand binding to PTCH1 and  
41 GAS1, CDON or BOC releases SMO inhibition leading to a signal transduction cascade that results in  
42 modulation of the GLI family of transcriptional effectors (Hui and Angers, 2011). Together, GAS1, CDON  
43 and BOC are required for HH signal transduction during embryogenesis (Allen et al., 2011; Allen et al.,  
44 2007; Cole and Krauss, 2003; Izzi et al., 2011; Martinelli and Fan, 2007; Tenzen et al., 2006; Zhang et al.,  
45 2011; Zhang et al., 2006)

46 Similar to *Shh* mutants, simultaneous genetic removal of *Gas1*, *Cdon* and *Boc* results in alobar HPE  
47 (Allen et al., 2011). Further, multiple mutations in these HH co-receptors have been identified in human  
48 HPE patients (Bae et al., 2011; Hong et al., 2017; Ribeiro et al., 2010), suggesting that these proteins play  
49 key roles in craniofacial development. This is supported by multiple studies in mice demonstrating a role for  
50 these genes during HH-dependent craniofacial development (Cole and Krauss, 2003; Seppala et al., 2007;  
51 Seppala et al., 2014; Zhang et al., 2011; Zhang et al., 2006). *Gas1* and *Cdon* single mutants display

52 microforms of HPE, in which the severity of the phenotype is dependent on the genetic background of the  
53 mouse model (Allen et al., 2007; Cole and Krauss, 2003; Seppala et al., 2007; Zhang et al., 2006). In  
54 contrast, in mixed genetic backgrounds *Boc* deletion does not result in any HPE phenotypes, although these  
55 animals do display defects in SHH-dependent commissural axon guidance (Okada et al., 2006; Seppala et  
56 al., 2014; Zhang et al., 2011). More recently, *Boc* has been demonstrated to function as silent HPE modifier  
57 gene that, in the context of other HPE mutations, can modify the severity of the HPE phenotype (Hong and  
58 Krauss, 2018). It has been proposed that modifier genes like *Boc* contribute to the phenotypic differences  
59 observed in different genetic backgrounds.

60 GAS1, CDON and BOC have generally been described as positive regulators of the HH signaling  
61 pathway. However, in certain contexts these co-receptors can act to restrain HH signaling. For example,  
62 *Gas1* can antagonize HH signaling in presomitic mesoderm explants (Lee et al., 2001), and restricts HH  
63 signaling during tooth development in mice (Cobourne et al., 2004; Ohazama et al., 2009). Similarly, *Cdon*  
64 negatively regulates HH pathway function in the optic vesicle of zebrafish and chicken embryos (Cardozo et  
65 al., 2014), while *Boc* antagonizes HH signaling in the zebrafish lower jaw (Bergeron et al., 2011). It remains  
66 unclear how these co-receptors differentially regulate HH signaling in these different contexts.

67 Here we investigated the contributions of GAS1, CDON and BOC to HH-dependent mammalian  
68 craniofacial development. Specifically, we examined the individual and combined deletion of different HH  
69 co-receptors on a congenic C57BL/6J background. Surprisingly, we found that *Boc* mutants display facial  
70 widening, consistent with HH increased activity. Additionally, deletion of *Boc* in a *Gas1* null background  
71 partially ameliorates the craniofacial defects observed in *Gas1* single mutants, while other HH-dependent  
72 phenotypes in these mutants are significantly worsened. Interestingly, the rescue of the craniofacial defects  
73 in *Gas1;Boc* mutants persists over developmental time, and is restricted to the nasal bone and the nasal  
74 capsule. Finally we provide evidence that BOC selectively restricts neural crest-derived mesenchymal  
75 proliferation. Together, our data indicate that BOC acts as a multi-functional regulator of HH signaling  
76 during craniofacial development, alternately promoting or restraining HH pathway activity in a tissue-  
77 specific fashion.

78



## 79 Results

80 To define the expression of the HH pathway co-receptors *Gas1*, *Cdon* and *Boc* during early  
81 craniofacial development, we utilized *lacZ* (*Gas1* and *Cdon*) and *Alkaline phosphatase* (*AP*; *Boc*) reporter  
82 alleles (Fig. 1) (Cole and Krauss, 2003; Martinelli and Fan, 2007; Zhang et al., 2011). At E8.5 *Gas1*, *Cdon*  
83 and *Boc* are primarily expressed in the cranial neural folds, the somites and the neural tube (Fig. 1A-D).  
84 During this stage *Cdon* is the only co-receptor expressed in the prechordal plate (PCP), a major signaling  
85 center during craniofacial development that secretes SHH ligand, which patterns the ventral telencephalon  
86 (Fig. 1C) (Cordero et al., 2004; Rubenstein and Beachy, 1998; Zhang et al., 2006). As development  
87 progresses, these expression patterns are maintained in the somites and neural tube, and expand to additional  
88 structures. At E9.5 the HH co-receptors are all expressed in the frontonasal prominence (FNP), maxillary  
89 process (MXP) and mandibular process (MP; Fig. 1E-H). Differences in *Gas1*, *Cdon* and *Boc* expression in  
90 craniofacial structures are revealed by analysis of E10.5 embryos (Fig. 1I-T).

91 En face views of whole-mount stained E10.5 embryos (Fig. 1M-P) demonstrate broad expression of  
92 *Gas1*, *Cdon* and *Boc* in the telencephalon. X-Gal and AP staining in coronal sections of E10.5 embryos  
93 reveals that all three co-receptors are present in the surface ectoderm and in the neuroepithelium (NE) of the  
94 telencephalon in a dorso-ventral gradient (Fig. 1 Q-T; Fig. S1A-D). Notably, the ventral extent of *Cdon*  
95 expression in the NE is restricted compared to *Gas1* and *Boc*. Similarly, *Gas1* and *Boc* display broad  
96 expression in the olfactory epithelium (OE), while *Cdon* expression is limited to a subset of cells in the  
97 medial OE of the LNP (see black arrowhead in Fig. 1S, Fig. S1F).

98 At E10.5, *Gas1* is the only co-receptor expressed in the MP and in the MXP (Fig. 1J, N). Further  
99 differences in the expression of the HH co-receptors are detected in the medial nasal and lateral nasal  
100 processes (MNP and LNP). All three co-receptors are expressed in the LNP (Fig. 1Q-T). However, *Gas1*  
101 and *Boc* are expressed throughout the LNP mesenchyme, while *Cdon* expression is restricted to the most  
102 dorsal aspect of the LNP mesenchyme (Fig. 1S, Fig. S1F). In the MNP, *Gas1* and *Boc* are broadly expressed  
103 at lower levels in the mesenchyme; in contrast, *Cdon* is only expressed in mesenchymal cells that are  
104 proximal to the NE (Fig. 1S, Fig. S1F). The expression patterns of *Gas1*, *Cdon* and *Boc* in craniofacial  
105 structures are consistent with their negative transcriptional regulation by the HH signaling pathway (Allen et  
106 al., 2007; Tenzen et al., 2006). In addition to differences in expression of the HH co-receptors in  
107 craniofacial structures, their expression in other HH-responsive tissues such as the forelimb bud (Fig. S1H–  
108 K), and the neural tube (Fig. S1L–O) is also not identical. Overall, we noted that the expression domain of  
109 *Boc* in the NE of the telencephalon and in the neural tube extends closer to the SHH ligand source in both  
110 tissues. These data raise the question of whether these co-receptors, and *BOC* in particular, may  
111 differentially contribute to HH-dependent craniofacial development.

112 To address the individual contributions of *Gas1*, *Cdon*, and *Boc* to craniofacial development, we  
113 examined single mutant embryos at mid-gestation on a congenic C57BL/6J background (Fig. 2). At E10.5

114 *Gas1*<sup>-/-</sup> and *Cdon*<sup>-/-</sup> embryos display a spectrum of HPE phenotypes that range from proper telencephalic  
115 vesicle (TV) division with normal MNP separation, to no TV division with no MNP separation (Fig. 2A-D,  
116 E-H; Fig. S2). Most of these mutants exhibit incomplete TV division (76% of *Gas1*<sup>-/-</sup> embryos, and 50% of  
117 *Cdon*<sup>-/-</sup> embryos), while a smaller portion (12% and 17%, respectively) of these mutants fails to divide the  
118 TV (Fig. 2M). *Gas1*<sup>-/-</sup> and *Cdon*<sup>-/-</sup> embryos predominantly show either incomplete MNP separation (47% of  
119 *Gas1*<sup>-/-</sup> embryos, and 33% of *Cdon*<sup>-/-</sup> embryos) or no MNP separation (29% and 42%, respectively; Fig. 2N).  
120 Notably, a minority of *Gas1* and *Cdon* mutants have more mild phenotypes that are characterized by normal  
121 TV division (Fig. 2M) and either normal or reduced MNP separation (Fig. 2N). In contrast, *Boc*<sup>-/-</sup> embryos  
122 do not manifest any gross craniofacial defects (Fig. 2I-L), with 100% of embryos displaying normal TV  
123 division and normal MNP separation (Fig. 2M-N). Together, these data indicate that even on a congenic  
124 C57BL/6J genetic background there remains a spectrum of HPE phenotypes observed in *Gas1* and *Cdon*  
125 mutants. Strikingly, and despite the broad expression of *Boc* in multiple HH-responsive cell types in the  
126 developing forebrain (Fig. 1), we do not observe any HPE phenotypes in *Boc* mutants maintained on a  
127 C57BL/6J background.

128 To further characterize the spectrum of HPE phenotypes, we quantified the internasal distance in  
129 E10.5 embryos. Consistent with our initial assessment, this quantitation revealed significant reductions in  
130 the internasal distance in both *Gas1* and *Cdon* mutant embryos (Fig. 2O). Surprisingly, this quantitation also  
131 revealed an unexpected subtle, but significant increase in the internasal distance in *Boc* mutant embryos  
132 compared to wildtype embryos (443µm in wildtype embryos and 496µm in *Boc*<sup>-/-</sup> embryos; Fig. 2O). These  
133 data suggest potentially opposing roles for *Gas1* and *Cdon* compared to *Boc* during mammalian craniofacial  
134 development. One explanation for these counterintuitive results is that the increased internasal distance in  
135 *Boc* embryos was due to an overall increase in embryo size. Therefore, we measured the crown-rump length  
136 (CRL) in E10.5 wildtype and mutant embryos (Fig. S3A-E). While *Gas1* mutants are significantly smaller  
137 than their wildtype littermates, both *Cdon* and *Boc* mutant embryos have similar CRL as wildtype embryos  
138 (Fig. S3F). These data support the notion that the MNP widening observed in *Boc* mutants at E10.5 reflects  
139 differences in the contribution of this HH co-receptor to craniofacial development. Interestingly, widening  
140 or duplication of midfacial tissues is associated with increased levels of HH signaling (Brugmann et al.,  
141 2010; Hu and Helms, 1999).

142 To determine if the variable craniofacial defects observed in these HH co-receptor mutant embryos  
143 correlates with HH pathway activity, we performed *in situ* hybridization for *Gli1*, a general and direct  
144 transcriptional target of HH signaling (Dai et al., 1999). *Gli1* is expressed in multiple craniofacial structures,  
145 including the MNP, MXP and MP (Fig. S4A). *Gas1*<sup>-/-</sup> and *Cdon*<sup>-/-</sup> embryos with less severe HPE phenotypes  
146 maintain *Gli1* expression in the MNP, but embryos with increasingly severe HPE phenotypes display a loss  
147 of *Gli1* expression in the MNP (Fig. S4D-F, G-I). Consistent with the midfacial widening observed in *Boc*<sup>-/-</sup>  
148 embryos, *Gli1* expression is maintained in the MNP across all *Boc* mutant embryos (Fig. S4J-L). Taken

149 together, these data demonstrate that HPE severity in *Gas1* and *Cdon* mutant embryos correlates with *Gli1*  
150 loss in the MNP, and confirms that *Boc* mutants do not display any reduced HH pathway activity during  
151 craniofacial development.

152 While previous studies suggested that combinatorial deletion of *Gas1*, *Cdon*, or *Boc* results in more  
153 severe HPE phenotypes (Allen et al., 2011; Allen et al., 2007; Seppala et al., 2014; Zhang et al., 2011), work  
154 in zebrafish suggested a potential negative role for *Boc* in lower jaw development (Bergeron et al., 2011).  
155 Furthermore, a *Boc* missense variant associated with increased HH pathway activity has been recently  
156 identified in human HPE patients (Hong et al., 2017). The midface widening that we observed in *Boc*<sup>-/-</sup>  
157 embryos (Fig. 2O) is consistent with a role for *Boc* as a potential HH antagonist during craniofacial  
158 development. To explore this possibility, we deleted *Boc* in combination with *Gas1* deletion on a congenic  
159 C57BL/6J background.

160 Analysis of E10.5 *Gas1*<sup>-/-</sup>;*Boc*<sup>-/-</sup> embryos revealed a spectrum of HPE phenotypes, as observed in  
161 *Gas1*<sup>-/-</sup> embryos (Fig. S4M-O). Importantly, the HPE phenotypes observed in *Gas1*;*Boc* double mutants are  
162 less severe than those observed in *Gas1* single mutants (cf. Fig. 3B and 3D). Specifically, we observed an  
163 increase in the percentage of *Gas1*;*Boc* double mutants with normal TV division compared to *Gas1* single  
164 mutants (31% vs. 12%, respectively; Fig. 3E). Further, we found that 50% of *Gas1*;*Boc* double mutants  
165 display MNP separation compared to 24% of *Gas1* mutants (Fig. 3F). To investigate whether this rescue  
166 was due to increased overall embryo size, we measured the CRL of *Gas1*<sup>-/-</sup>;*Boc*<sup>-/-</sup> embryos (Fig. S5A-E). We  
167 find that *Gas1*<sup>-/-</sup>;*Boc*<sup>-/-</sup> embryos tend to be smaller than *Gas1*<sup>-/-</sup> embryos (Fig. 5F); while not statistically  
168 significant, these data rule out increased embryo size as an explanation for the rescue of the HPE  
169 phenotypes. Overall, these data suggest that *Boc* deletion in a *Gas1* mutant background partially rescues TV  
170 and MNP separation in E10.5 embryos.

171 To determine if the phenotypes observed in *Gas1*;*Boc* mutants correlate with changes in HH  
172 pathway activity, we performed *in situ* hybridization for the direct HH transcriptional target *Gli1* in E10.5  
173 wildtype, *Gas1*<sup>-/-</sup>, *Boc*<sup>-/-</sup>, and *Gas1*<sup>-/-</sup>;*Boc*<sup>-/-</sup> embryos (Fig 3G-J). *Gas1*<sup>-/-</sup>;*Boc*<sup>-/-</sup> embryos that display increased  
174 MNP separation also display increased *Gli1* expression in the MNP (Fig 3J), consistent with the notion that  
175 *Boc* antagonizes HH pathway activity during craniofacial development. We also examined *Gli1* expression  
176 in the forelimb bud from these same embryos (Fig. 3G'-J'). Notably, we detected decreased *Gli1* expression  
177 in *Gas1*;*Boc* mutants compared to wildtype and *Gas1* mutant embryos (cf. Fig. 3G', H', J'). Together these  
178 data suggest that loss of *Boc* partially and selectively rescues HPE phenotypes observed in *Gas1* mutant  
179 embryos, through increased HH pathway activity.

180 To examine the consequences of *Boc* deletion on additional targets of the HH pathway, and to begin  
181 to dissect possible tissue-specific contributions to craniofacial development, we investigated HH-dependent  
182 neural patterning in both the developing forebrain and spinal cord (Fig. 4). Specifically, we used whole  
183 mount immunofluorescence to analyze the expression of NKX2.1, a direct HH transcriptional target in the

184 ventral telencephalon (Pabst et al., 2000) (Fig. 4E-H,M). In E10.5 *Gas1*<sup>-/-</sup> embryos the expression domain of  
185 NKX2.1 is significantly reduced (Fig. 4F), while the NKX2.1+ domain in *Boc*<sup>-/-</sup> embryos is unchanged  
186 compared to wildtype embryos (cf. Fig. 4E,G). Notably, compared to *Gas1*<sup>-/-</sup> embryos (Fig. 4F), *Gas1*<sup>-/-</sup>;*Boc*<sup>-/-</sup>  
187 embryos maintain a similar NKX2.1+ domain (Fig. 4H). Quantitation confirms that the NKX2.1+ area is  
188 not significantly altered in *Gas1*<sup>-/-</sup>;*Boc*<sup>-/-</sup> embryos compared to *Gas1*<sup>-/-</sup> embryos (Fig. 4M). We also  
189 confirmed that NKX2.1 is not significantly different in *Boc*<sup>-/-</sup> embryos (Fig. 4M). Together, these data  
190 suggest that, despite its broad expression in the forebrain neuroepithelium (Fig. 1T), *Boc* does not positively  
191 contribute to HH-dependent patterning in this tissue. These data do raise the question of whether *Boc* can  
192 regulate HH signaling in the developing telencephalon, or whether it may be playing an antagonistic role.  
193 To address these possibilities, we used chicken *in ovo* telencephalon electroporations to assess *Boc* function  
194 during HH-dependent neural patterning in the forebrain (Fig. S6). Expression of GFP (pCIG, empty vector)  
195 in the chicken telencephalon does not affect NKX2.1 expression (Fig. S6A-D). In contrast, expression of  
196 *SmoM2* (a constitutively active form of SMO) (Xie et al., 1998), which drives high levels of HH pathway  
197 activity, induces ectopic NKX2.1 expression (Fig. S6E-H). Similarly, expression of *Boc* also induces  
198 ectopic NKX2.1 expression (Fig. S6I-L). These data demonstrate that *Boc* can promote HH-dependent  
199 patterning in the developing chicken forebrain, and suggests that *Boc* does not play an antagonistic role in  
200 the forebrain neuroepithelium.

201 We also analyzed HH-dependent neural patterning in the spinal cord of wildtype, *Gas1*<sup>-/-</sup>, *Boc*<sup>-/-</sup>, and  
202 *Gas1*<sup>-/-</sup>;*Boc*<sup>-/-</sup> embryos (Fig. 4 I-L,N). We examined the expression of NKX2.2 and OLIG2, two direct HH  
203 transcriptional targets that are activated in response to high and moderate levels of SHH signaling,  
204 respectively (Dessaud et al., 2008; Lei et al., 2006; Wang et al., 2011). At E10.5, *Gas1*<sup>-/-</sup> embryos display a  
205 significant reduction in the number of NKX2.2+ cells compared to wildtype embryos (Fig. 4J,N).  
206 Quantitation of patterning in *Boc*<sup>-/-</sup> embryos revealed a slight, but significant reduction in the NKX2.2  
207 population (Fig. 4K,N). Strikingly, *Gas1*<sup>-/-</sup>;*Boc*<sup>-/-</sup> embryos have a very severe phenotype— OLIG2 expression  
208 is completely absent (Fig. 4L), and we observe a near complete absence of NKX2.2 expression (Fig.4 L,N).  
209 In some sections from *Gas1*;*Boc* mutants we could detect a few NKX2.2+ cells (Fig. 4L, inset). Overall,  
210 these data are consistent with previous studies (Allen et al., 2011), and further demonstrates that *Boc*  
211 selectively contributes to spinal cord, but not forebrain neural patterning.

212 Given that E10.5 *Gas1*<sup>-/-</sup>;*Boc*<sup>-/-</sup> mutants manifest a partial rescue of the craniofacial defects observed  
213 in *Gas1* single mutants, we investigated whether this rescue is maintained over developmental time. This  
214 question is particularly relevant since a prior analysis of *Gas1*<sup>-/-</sup>;*Boc*<sup>-/-</sup> embryos maintained on a mixed  
215 129sv/C57BL/6/CD1 background demonstrated severe craniofacial defects such as clefting of the lip, palate  
216 and tongue, and disruption of the maxillary incisor (Seppala et al., 2014). To address this question, we  
217 examined craniofacial development in E18.5 wildtype and mutant embryos (Fig. 5A-D). Consistent with  
218 previous work, E18.5 *Gas1*<sup>-/-</sup> embryos display a range of craniofacial defects, while *Boc*<sup>-/-</sup> embryos appear

219 phenotypically normal (Fig. 5A-C, Fig. S7A-B, E-F) (Allen et al., 2011; Allen et al., 2007; Seppala et al.,  
220 2007; Seppala et al., 2014; Zhang et al., 2011). *Gas1*<sup>-/-</sup> and *Gas1*<sup>-/-</sup>;*Boc*<sup>-/-</sup> embryos share defects that include  
221 microphthalmia, midface and mandible hypoplasia, and cleft palate (Martinelli and Fan, 2007). Strikingly,  
222 and similar to what was observed during earlier developmental stages, E18.5 *Gas1*<sup>-/-</sup>;*Boc*<sup>-/-</sup> mutants display a  
223 less severe phenotype in specific craniofacial structures (Fig. 5D,P). Specifically, *Gas1*<sup>-/-</sup>;*Boc*<sup>-/-</sup> mutants  
224 display a wider maxilla and partial separation of the nasal pits; in comparison, *Gas1*<sup>-/-</sup> embryos have a  
225 smaller maxilla and no separation of the nasal pits (cf. black and white arrows in Fig. 5B,D). Skeletal  
226 preparations (Fig. 5E-L) confirm that *Gas1*<sup>-/-</sup>;*Boc*<sup>-/-</sup> mutants exhibit separation of the nasal capsule, while in  
227 *Gas1*<sup>-/-</sup> single mutants the nasal capsule is not separated (Fig. 5F,H). In addition to the nasal capsule, some  
228 *Gas1*<sup>-/-</sup>;*Boc*<sup>-/-</sup> embryos exhibit widening of the premaxilla, although in others it is hypoplastic (see red arrow  
229 in Fig. 5H and inset in Fig. S7H). These data suggest that the amelioration of the craniofacial defects  
230 observed at E10.5 in *Gas1*;*Boc* mutant embryos persists over developmental time.

231 In contrast to the nasal capsule and premaxilla, *Gas1*<sup>-/-</sup>;*Boc*<sup>-/-</sup> embryos exhibit a shortened mandible  
232 and truncated meckel's cartilage compared to *Gas1*<sup>-/-</sup> embryos (Fig. 5J,L). The mandible of *Gas1*<sup>-/-</sup>;*Boc*<sup>-/-</sup>  
233 mutants also exhibit ectopic bone duplications on the posterior inferior side of the mandible (Fig. 5L).  
234 Occasionally, *Gas1*<sup>-/-</sup> mutants with severe HPE phenotypes display a similar phenotype (Fig. 5J inset). Bone  
235 duplications have been associated with loss of HH signaling in the mandibular neural crest-derived  
236 mesenchyme (Jeong et al., 2004; Xu et al., 2019). *Gas1*<sup>-/-</sup>;*Boc*<sup>-/-</sup> mutants also display severe defects in the  
237 maxilla, palatine bone and the occipital bone (Fig. S7H). We also evaluated SHH-dependent digit  
238 specification in these embryos (Fig. S7E'-H'). Consistent with previous work (Allen et al., 2011), combined  
239 loss of *Gas1* and *Boc* results in severe digit specification defects (Fig. S7H'). These results suggest opposing  
240 and tissue-specific contributions of *Boc* to HH-dependent craniofacial development.

241 To further investigate these phenotypes, we analyzed three (3D) dimensional reconstructions from  
242 micro-computed tomography ( $\mu$ CT) images (Fig. 5M'-P', Fig. S7A'-D'). Specifically, we focused on the  
243 nasal bone, where we observed the partial rescue in *Gas1*;*Boc* mutants. The 3D reconstructions indicated  
244 that the nasal bone in *Gas1*<sup>-/-</sup>;*Boc*<sup>-/-</sup> mutants is partially restored compared to *Gas1*<sup>-/-</sup> mutants where this  
245 bone is smaller and fragmented (Fig. 5N', P'). As we observed at E10.5 (Fig. 2), there is a spectrum of HPE  
246 phenotypes in *Gas1* mutants (Fig. S7A-D); however, we consistently observe that the nasal bone of  
247 *Gas1*;*Boc* mutants is not as severely affected as the *Gas1* single mutants (Fig. S7A'-D'). These data confirm  
248 that *Gas1*<sup>-/-</sup>;*Boc*<sup>-/-</sup> embryos display a less severe phenotype in the nasal bone and in the nasal capsule than  
249 *Gas1*<sup>-/-</sup> embryos.

250 To investigate the mechanisms that could explain the partial rescue observed in *Gas1*<sup>-/-</sup>;*Boc*<sup>-/-</sup>  
251 embryos, we analyzed tissue-specific proliferation in the telencephalon of E10.5 wildtype and mutant  
252 embryos. Specifically, we performed immunofluorescent detection of Phospho-Histone H3 (PH3) in slides  
253 and co-stained with antibodies directed against E-CADHERIN (E-CAD) and PDGFR $\alpha$  to discriminate



254 between the surface ectoderm, forebrain neuroepithelium, and craniofacial mesenchyme (Fig. 6A-E).  
255 Coronal sections of E10.5 *Gas1*<sup>-/-</sup> mutant embryos display reduced numbers of PH3+ cells across the surface  
256 ectoderm, forebrain neuroepithelium, and craniofacial mesenchyme (Fig. 6B, F-H). Similarly, *Cdon*<sup>-/-</sup>  
257 embryos exhibit a significant decrease in proliferation both the surface ectoderm and craniofacial  
258 mesenchyme (Fig. 6C, F-H). In contrast, *Boc*<sup>-/-</sup> embryos do not display any apparent changes in the  
259 proliferation in the surface ectoderm or in the neuroepithelium (Fig. 6D, F,G). Further, *Boc*<sup>-/-</sup> embryos  
260 display a significant increase in mesenchymal proliferation compared to wildtype embryos (Fig. 6H). These  
261 results suggest that *Boc* negatively regulates proliferation specifically in craniofacial mesenchyme.

262 We also investigated tissue-specific proliferation in *Gas1*<sup>-/-</sup>;*Boc*<sup>-/-</sup> mutant embryos. Notably, the  
263 levels of proliferation in the surface ectoderm and the mesenchyme are not significantly different when  
264 compared to wildtype embryos (Fig. 6F,H) In contrast, proliferation is significantly decreased in the  
265 forebrain neuroepithelium of *Gas1*;*Boc* mutants (Fig. 6G). Surprisingly, this effect on proliferation appears  
266 to be quite selective, as there are no significant changes in proliferation in *Boc* mutants in either the neural  
267 tube or the forelimb mesenchyme (Fig. S8). Overall, these data demonstrate that *Boc* functions in a non-  
268 redundant manner to restrict proliferation in the craniofacial mesenchyme, while acting in concert with  
269 *Gas1* and *Cdon* to promote proliferation in the forebrain neuroepithelium.

270

271 Discussion

272 Here we investigated the individual and combined contributions of the HH co-receptors *Gas1*, *Cdon*  
273 and *Boc* during HH-dependent craniofacial development. We found that *Boc* displays a significantly broader  
274 expression pattern than *Gas1* and *Cdon* in multiple craniofacial structures. Surprisingly, and distinct from  
275 *Gas1* and *Cdon*, loss of *Boc* alone does not result in any detectable reduction of HH pathway activity in  
276 developing craniofacial structures. Instead, we find that genetic deletion of *Boc* results in facial widening  
277 that is consistent with increased HH pathway activity (Brugmann et al., 2010; Hu and Helms, 1999).  
278 Further, analysis of *Gas1*;*Boc* double mutants revealed an amelioration of the craniofacial phenotype  
279 observed in *Gas1* single mutants, corresponding with increased HH pathway activity, and consistent with  
280 the notion that loss of *Boc* can counterintuitively drive increased HH signaling. Notably, this improvement  
281 is restricted to a subset of craniofacial structures, but persists throughout embryonic development.  
282 Mechanistic analyses suggest that *Boc* achieves these tissue-specific effects through the selective restriction  
283 of proliferation in the neural crest-derived mesenchyme. Taken together, these data demonstrate that *Boc*  
284 regulates HH signaling in a tissue-specific manner, and suggests that, in certain tissues, *BOC* works in  
285 opposition to other HH co-receptors to restrain HH pathway function.

286 Genetic background-dependent phenotypic differences in HH co-receptor mutants

287 Understanding the molecular mechanisms that underlie HPE is confounded by the significant  
288 phenotypic variability observed in this disease, and the complex genetics that contribute to proper  
289 craniofacial development. Our data indicate that, even when maintained on a congenic C57BL/6J  
290 background, *Gas1* and *Cdon* mutants display a range of HPE phenotypes. These phenotypes vary from  
291 microforms of HPE to semilobar HPE, and their severity correlates with HH pathway activity as assessed by  
292 *Gli1* expression. The variability in the HPE phenotypes of our mutants could be explained due to multiple  
293 genetic and non-genetic risk factors (Hong and Krauss, 2018). In particular, the variable severity across the  
294 phenotypes in our mutants could arise from stochastic changes in the establishment or response to the SHH  
295 morphogen gradient in the neuroepithelium, neural crest-derived mesenchyme, and/or surface ectoderm. In  
296 early craniofacial structures *Shh* is expressed sequentially, initiating in the prechordal plate, followed by the  
297 diencephalon and telencephalon, subsequently in the surface ectoderm of the frontonasal prominence, and  
298 finally in the pharyngeal endoderm of the first branchial arch (Aoto et al., 2009; Cordero et al., 2004;  
299 Marcucio et al., 2005; Rubenstein and Beachy, 1998; Xavier et al., 2016a). This complex developmental  
300 expression sequence of *Shh*, which is required to properly pattern the craniofacial structures (Krauss, 2007),  
301 combined with the differential expression of multiple HH receptors could generate an inherent variability  
302 that affects the severity of the HPE phenotypes.

303 The lack of craniofacial defects in *Boc* mutants maintained on different genetic mixed backgrounds  
304 (Okada et al., 2006; Seppala et al., 2014; Zhang et al., 2011) suggested a minor, redundant role for *Boc* in  
305 HH-dependent craniofacial development. This notion of *Boc* as a silent HPE modifier gene is supported by

306 studies where *Boc* deletion in a *Gas1* or *Cdon* null background enhances HPE severity and decreases the  
307 levels of HH pathway targets (Seppala et al., 2014; Zhang et al., 2011). However, our data indicate that *Boc*  
308 mutants on a C57BL/6J background exhibit internasal distance widening in E10.5 embryos. These data  
309 suggest an antagonistic role for *Boc* in HH signaling and comports with a previous description of *Boc* as a  
310 potential HH pathway antagonist in the zebrafish lower jaw (Bergeron et al., 2011). While we do not  
311 observe any mandible phenotypes in *Boc*<sup>-/-</sup> embryos, species-specific differences in craniofacial  
312 development between mouse and fish likely limit our ability to draw a direct connection. Alternatively, our  
313 analysis of *Boc* in the developing mandible may not be comprehensive enough to reveal this function.  
314 Regardless, our data reveal a novel, antagonistic role for *Boc* during aspects of craniofacial development,  
315 and raises the question of whether BOC may work in concert with other known redundant HH pathway  
316 antagonists, including PTCH1, PTCH2 and HHIP1, to maintain the balance between HH pathway activation  
317 and inhibition (Holtz et al., 2013) in craniofacial structures. Additionally, our data suggest that HH co-  
318 receptors can function to alternately promote or antagonize HH signaling depending on the context. In  
319 support of this notion, *Gas1* (Cobourne et al., 2004; Lee et al., 2001; Ohazama et al., 2009) and *Cdon*  
320 (Cardozo et al., 2014) can negatively regulate HH pathway function in different tissues.

321 *Boc* deletion partially rescues the HPE phenotypes of *Gas1* single mutants. Specifically, *Gas1;Boc*  
322 double mutants display increased MNP separation at E10.5, and restoration of the nasal capsule and nasal  
323 bone at E18.5. Importantly, these phenotypes correlate with increased *Gli1* levels, suggesting that *Boc*  
324 selectively antagonizes HH signaling during craniofacial development. These data partially contrast with  
325 previous work (Seppala et al., 2014), in which *Gas1;Boc* mutants on a 129Sv-C57BL/6/CD1 genetic  
326 background display more severe phenotypes than those observed in *Gas1* mutants (Seppala et al., 2014).  
327 Although *Gas1;Boc* mutants on a C57BL/6J background display severe defects in the majority of the bones  
328 of the skull and cleft palate as previously reported (Seppala et al., 2014), we never observe clefting of the lip  
329 in these mutants. Given that the lip is formed by the fusion of the MXP and MNP (Jiang et al., 2006), this  
330 result is consistent with the partial rescue mediated by *Boc* deletion in the nasal bone and nasal capsule.

### 331 Tissue-specific functions of BOC in HH signal transduction

332 Analysis of HH transcriptional targets revealed that *Boc* deletion results in differential changes in  
333 HH-dependent gene expression in a tissue-specific fashion (Fig. 7A). Specifically, our data suggest that  
334 BOC promotes the expression of the direct HH transcriptional target, NKX2.2, in the spinal cord  
335 neuroepithelium, but does not contribute to expression of NKX2.1 in the telencephalon neuroepithelium.  
336 These data suggest that BOC differentially regulates HH-dependent neural patterning at distinct axial levels.  
337 Further, BOC promotes *Gli1* expression in the limb bud mesenchyme, but antagonizes *Gli1* expression in  
338 the forebrain mesenchyme. Notably, *Boc* appears to selectively impact HH-dependent patterning, but not  
339 proliferation in the developing limb bud; conversely, *Boc* selectively inhibits proliferation in the neural  
340 crest-derived mesenchyme of the craniofacial structures (Fig 7A). This is consistent with previous work by



341 (Xavier et al., 2016b) suggesting that *Boc* contributes to mesenchymal proliferation in the palatal shelf.  
342 Taken together, these data argue that BOC regulates patterning and proliferation in a tissue-specific manner  
343 and raises the possibility that BOC performs multiple, and in some cases, opposing roles in HH signal  
344 transduction.

345 *Boc as a multi-functional regulator of HH signaling*

346 Based on our data, and the work of others, we propose a model whereby BOC acts as a multi-  
347 functional receptor to contribute to vertebrate embryogenesis (Fig. 7B). Specifically, we propose that BOC  
348 can act to: 1) promote HH signaling through interactions with HH ligands and the canonical receptor  
349 PTCH1; 2) antagonize HH signaling, either through ligand sequestration, or perhaps through the formation  
350 of an inhibitory complex with PTCH1; 3) contribute to HH-dependent signaling via its unique cytoplasmic  
351 domain; 4) function independently of the HH pathway.

352 BOC physically interacts with PTCH1 in a SHH-independent manner (Izzi et al., 2011). In  
353 craniofacial structures PTCH1 and BOC are co-expressed in a subset of cells in the MNP (Seppala et al.,  
354 2014). The differential interaction of these proteins could allow the formation of a receptor complex that  
355 alternately activates or inhibits HH pathway activity. Alternatively, BOC binding to HH ligands via its  
356 extracellular domain (Beachy et al., 2010; McLellan et al., 2008; Yao et al., 2006) raises the possibility that  
357 BOC can sequester SHH ligand in areas of low SHH concentration, and subsequently antagonize HH  
358 signaling. Consistent with this notion, *Boc* expression in HH-responsive tissues generally extends closer to  
359 the source of SHH ligand than either *Gas1* or *Cdon*.

360 BOC displays a unique cytoplasmic domain that does not resemble any other protein or motif (Kang  
361 et al., 2002). Recently work suggests that the BOC cytoplasmic domain binds to the non-receptor tyrosine  
362 kinase ABL (Vuong et al., 2017) and to the adaptor protein ELMO1 (Makihara et al., 2018). Thus, this  
363 domain could be critical to mediate tissue-specific, HH-dependent signals, or to perform HH-independent  
364 functions through the activation of downstream signaling cascades. It will be interesting to investigate the  
365 contribution of the BOC cytoplasmic domain to its tissue-specific functions during craniofacial  
366 development. Overall, this work identifies multiple and distinct roles for BOC in HH-dependent craniofacial  
367 development.

368

369 Materials and methods

370 Reagents

371 For reagents and primary antibodies see supplemental table 1, and supplemental table 2, respectively in the  
372 supplementary information.

373

374 Animal Models

375 *Gas1<sup>lacZ</sup>* (Martinelli and Fan, 2007), *Cdon<sup>lacZ-2</sup>* (Cole and Krauss, 2003), and *Boc<sup>AP</sup>* (Zhang et al., 2011) mice  
376 have been all described previously. *Gas1*, *Cdon*, and *Boc* mutants were backcrossed for at least ten  
377 generations to create lines on a congenic C57BL/6J background. *Cdon<sup>lacZ-1</sup>* mice (Cole and Krauss, 2003)  
378 were maintained on a mixed 129/Sv/C57BL/6 background for expression analysis. For embryonic  
379 dissections, noon of the day on which a vaginal plug was detected was considered as E0.5. For precise  
380 staging, somites were counted during the dissection. Embryos with 34-38 somites were considered E10.5  
381 embryos. Fertilized eggs were obtained from the Poultry Teaching & Research Center at Michigan State  
382 University. To obtain Hamburger-Hamilton (HH) stage 11 chicken embryos, the fertilized eggs were  
383 incubated 39-40 hours at 37°C in a GQF 1550 hatcher incubator with normal humidity settings (45%-55%).  
384 All animal procedures were reviewed and approved by the Institutional Animal Care and Use Committee  
385 (IACUC) at the University of Michigan.

386

387 X-gal staining

388 Embryos were dissected in 1X PBS, pH 7.4, and fixed (1% formaldehyde, 0.2% glutaraldehyde, 2mM  
389 MgCl<sub>2</sub>, 5mM EGTA, 0.02% NP-40) on ice for 10-60 minutes depending on the embryonic stage.  
390 Subsequently, the embryos were washed 3 x 5 minutes with 1X PBS, pH 7.4 + 0.02% NP-40 for  
391 permeabilization. B-Galactosidase activity was detected with X-Gal staining solution (5mM K<sub>3</sub>Fe(CN)<sub>6</sub>,  
392 5mM K<sub>4</sub>Fe(CN)<sub>6</sub>, 2mM MgCl<sub>2</sub>, 0.01% Na deoxycholate, 0.02% NP-40, 1mg/mL X-gal). The signal was  
393 developed from 25 minutes to 24 hours at 37° C depending on the *lacZ* allele. After staining, the embryos  
394 were washed 3 x 5 minutes with 1X PBS, pH 7.4 at 4°C, and post-fixed in 4% paraformaldehyde for 20  
395 minutes at room temperature, followed by 3 x 5 minute washes in 1X PBS, pH 7.4. Finally, embryos were  
396 stored and photographed in 1X PBS, pH 7.4 + 50% glycerol. X-gal staining of sections (20µm) was  
397 performed as described above for whole mount embryos. After staining, sections were washed 3 x 5 minutes  
398 with 1X PBS, pH 7.4, counterstained with nuclear fast red for 5 minutes and dehydrated in an ethanol series  
399 (70% ethanol, 95% ethanol, 100% ethanol and 100% Xylenes) followed by application of coverslips with  
400 permount mounting media.

401

402 Alkaline Phosphatase Staining

403 Embryos were dissected on 1X PBS, pH 7.4, and fixed (1% formaldehyde, 0.2% glutaraldehyde, 2mM  
404 MgCl<sub>2</sub>, 5mM EGTA, 0.02% NP-40) on ice for 10-60 minutes depending on the embryonic stage on ice.  
405 Subsequently, the embryos were washed 3 x 5 minutes with 1X PBS, pH 7.4. To deactivate endogenous  
406 alkaline phosphatases, embryos were incubated in 1X PBS, pH 7.4 at 70°C for 30 minutes. Then the  
407 embryos were rinsed with 1X PBS, pH 7.4 and washed for 10 minutes in alkaline phosphatase buffer  
408 (100mM NaCl, 100mM Tris-HCl pH9.5, 50mM MgCl<sub>2</sub>, 1% Tween-20) at room temperature. Embryos were  
409 stained with BM purple from 2 to 3 hours at 37°C depending on the embryonic stage. After staining, the  
410 embryos were washed 3 x 5 minutes with 1X PBS, pH 7.4 at 4°C, and post-fixed in 4% paraformaldehyde  
411 for 20 minutes at room temperature, followed by 3 x 5 minute washes with 1X PBS, pH 7.4. Finally,  
412 embryos were stored and photographed in 1X PBS, pH 7.4 + 50% glycerol. Alkaline phosphatase staining  
413 of sections (20µm) was performed as described above for whole mount embryos. After staining, sections  
414 were washed 3 x 5 minutes with 1X PBS, pH7.4, counterstained with nuclear fast red for 5 minutes and  
415 dehydrated in an ethanol series (70% ethanol, 95% ethanol, 100% ethanol and 100% xylenes for five  
416 minutes each) followed by application of coverslips with permount mounting media.

417

#### 418 Whole-Mount Digoxigenin *in situ* Hybridization

419 Whole-mount digoxigenin *in situ* hybridization was performed as previously described in (Allen et al.,  
420 2011; Wilkinson, 1992). In brief, embryos were dissected in 1X PBS, pH 7.4 and fixed in 4%  
421 paraformaldehyde overnight on a rocking platform. After fixation, embryos were dehydrated in a  
422 methanol/PBST (1X PBS, pH 7.4 + 0.1 % Tween) series (25% methanol, 50 %methanol, 75% methanol)  
423 and stored in 100% methanol at -20°C until the experiment was performed for up to 6 months. Embryos  
424 were digested with 10µg/mL proteinase K at RT for 2 minutes. Hybridization was performed with the  
425 indicated digoxigenin probe with a concentration of 1ng/µL for 16-19 hours at 70°C. The embryos were  
426 incubated in alkaline phosphatase-conjugated anti-DIG antibody at a dilution of 1:4,000. AP-anti-DIG was  
427 detected with BM purple, and signal was developed for 3.5 hours at room temperature. Embryos were  
428 cleared in 50% glycerol in 1XPBST and were photographed using a Nikon SMZ1500 microscope.

429

#### 430 Immunofluorescence

431 Section immunofluorescence was performed as in (Allen et al., 2011). Embryos were dissected in 1X PBS,  
432 pH 7.4 and fixed for 1 hour in 4% paraformaldehyde on ice, followed by 3 x 5 minutes washes with 1X  
433 PBS, pH 7.4 and cryoprotected for 24-48 hours in 1X PBS + 30% sucrose. Embryos were embedded in  
434 OCT compound and sectioned on a Leica cryostat (12 µm thick forebrain and forelimb neural tube  
435 sections). Sections were blocked in blocking buffer (3% bovine serum albumin, 1% heat-inactivated sheep  
436 serum, 0.1% TritonX-100 in 1X PBS, pH 7.4) for 1 hour. Primary antibodies were diluted in blocking buffer  
437 incubated overnight at 4 °C in a humidified chamber. A list of all the primary antibodies used in this study is

438 provided in supplementary table 2. Secondary antibodies were diluted in blocking solution and incubated for  
439 1 hour at room temperature, followed by 3 x 5 minute washes with 1X PBS, pH 7.4. All Alexa Fluor Dyes  
440 secondary antibodies were used at a 1:500 dilution. Nuclei were labeled with DAPI for 10 minutes at room  
441 temperature and slides were mounted with coverslips using Immu-mount aqueous mounting medium.  
442 Sections were visualized on a Leica upright SP5X confocal microscope.

443

#### 444 Whole-Mount Immunofluorescence

445 Embryos were dissected in 1X PBS, pH 7.4, fixed with 4% paraformaldehyde for 2 hours at 4°C, and  
446 washed 2 x 10 minutes washes with PBTX (1X PBS + 0.1% Triton X-100). Subsequently, embryos were  
447 blocked for 1 hour in PBTX + 10% goat serum. Primary antibodies were diluted in PBTX + 10% goat  
448 serum and incubated overnight at 4 °C on a rocking platform. A list of all the primary antibodies used in this  
449 study is provided in the supplementary table 2. The next day the embryos were rinsed 2 x 5 minutes with  
450 PBTX, followed by 3 x 1 hour washes with PBTX on a rocking platform at 4°C. After the washes, embryos  
451 were incubated overnight with secondary antibodies diluted in PBTX+ 10% serum. All Alexa Fluor Dyes  
452 secondary antibodies were used at a 1:500 dilution. Next, embryos were washed as described for the  
453 primary antibody above, and cleared with *Clear*<sup>T2</sup> (25% Formamide/10%PEG for one hour; 50%  
454 Formamide/20%PEG for 72 hours) (Kuwajima et al., 2013). Finally, embryos were visualized on a Nikon  
455 SMZ1500 microscope. With the *Clear*<sup>T2</sup> reagent we did not observed any tissue expansion. (Protocol  
456 courtesy of Jean-Denis Benazet, UCSF)

457

#### 458 Micro Computed Tomography (Micro CT)

459 E18.5 embryos were skinned and eviscerated. Subsequently, embryos were fixed overnight in 100%  
460 ethanol, and maintained in 70% ethanol until ready to scan. The scans were performed using embryos  
461 covered with a 1X PBS, pH 7.4-soaked kim wipe and scanned over the entire length of the skull using the  
462  $\mu$ CT100 system (Scanco Medical, Bassersdorf, Switzerland). Scan settings were as follows: 12  $\mu$ m voxel  
463 size, 55 kVp, 109  $\mu$ A, 0.5 mm AL filter, and 500 ms integration time. Micro CT scans were analyzed with  
464 the Amira software (Thermo Fisher Scientific). The Micro CT scans were uploaded as DICOM files into the  
465 software and the three-dimensional reconstructions were generated using the isosurface feature. The  
466 individual bones were manually segmented using the extract surface and buffer tools of Amira (Ho et al.,  
467 2015). Finally, the individual bones were color coded.

468

#### 469 Skeletal Preparation

470 Skeletons were prepared as previously described before in (Allen et al., 2011). E18.5 embryos were skinned  
471 and eviscerated. Subsequently, embryos were fixed in 100% ethanol, followed by 100% acetone for 24  
472 hours respectively at room temperature. Cartilage and bone were stained with alcian blue/alizarin red

473 staining solution (5% alcian blue, 5% alizarin red, 5% glacial acetic acid and 70% ethanol) for 4 days at  
474 room temperature. The remaining tissue was digested with several washes of 1% potassium hydroxide. The  
475 skeletons were cleared by 24 hour washes of a gradient of glycerol (20%, 50%, and 80%) in 1% potassium  
476 hydroxide, and photographed in 80% glycerol.

477

#### 478 *In ovo* chicken electroporations

479 Chicken electroporations were performed as previously described in (Allen et al., 2011; Tenzen et al.,  
480 2006). The indicated construct (pCIG plasmid -1  $\mu\text{g}/\mu\text{l}$  in 1X PBS, pH7.4, with 50ng/ $\mu\text{l}$  fast green) was  
481 injected into the forebrain cavity of HH stage 11 chicken embryos. L-shaped electrodes were made with  
482 platinum wire, 8mm long (3mm were bent to form the L shape) and spaced 6mm apart. Electrodes (L-  
483 shaped part) were placed in front of the forebrain of the embryo (pulsed five times at 25 V for 50 ms with a  
484 BTX electroporator). The electroporated embryos were screened for GFP expression after 48 hours at HH  
485 stage 21-22 and processed for immunofluorescence.

486

#### 487 Quantitation and statistical analysis

488 All the data are represented as mean  $\pm$  standard deviation. All statistical analyses were performed using  
489 GraphPad statistic calculator (GraphPad Software, La Jolla California USA, [www.graphpad.com](http://www.graphpad.com)).  
490 Statistical significance was determined using two-tailed Student's *t*-test. Significance was defined according  
491 GraphPad Prism style: non-significant ( $p>0.05$ ), \* ( $p\leq 0.05$ ), \*\* ( $p\leq 0.01$ ), \*\*\* ( $p\leq 0.001$ ) and \*\*\*\* ( $p\leq 0.0001$ ).  
492 For all the experimental analyses a minimum of 3 embryos of each genotype were examined, each n  
493 represents an embryo. All the statistical details (statistical tests used, statistical significance and exact value  
494 of each n) for each experiment are specified in the figure legends.

495

#### 496 Telencephalic division and medial nasal process classification

497 Frontal pictures of E10.5 mouse embryos were photographed with a Nikon SMZ1500 microscope. Blind  
498 classification of the telencephalic division and media nasal process separation, was performed by a blinded  
499 evaluator according the categories showed in (Fig S2A-F).

500

#### 501 Internasal distance and crown-rump length quantitation

502 Pictures of the nasal processes and whole E10.5 embryos were taken in 1X PBS, pH7.4 with a Nikon  
503 SMZ1500 microscope. Internasal distance was defined as the distance between the edges of the medial nasal  
504 process. Crown rump length was defined as top of the crown of the midbrain, bisecting the forelimb bud to  
505 the curvature at the bottom c-shaped part of the embryo. Blind quantitation of the intranasal distance and  
506 crown-rump length was performed manually by a single evaluator using the scale bar tool of the NIS-  
507 Elements software (Nikon) annotations and measurements feature.

508 Immunofluorescence quantitation

509 To quantify immunofluorescence images, we examined a minimum of 3 embryos per genotype and 2  
510 sections from each embryo.

511

512 NKX2.1 quantitation: Side view pictures of whole mount immunofluorescent wildtype and mutant embryos  
513 were taken in *Clear*<sup>T2</sup> with a Nikon SMZ1500 microscope. The NKX2.1 area of expression was quantified  
514 using the area measure plugin of ImageJ (Schneider et al., 2012). Each image was thresholded automatically  
515 by ImageJ before the area of expression was quantified.

516

517 NKX2.2 quantitation: Pictures of transverse sections of wildtype and mutant neural tubes stained with  
518 antibodies directed against NKX2.2 were merged with their respective DAPI images. NKX2.2 positive cells  
519 were quantified with the point tool of ImageJ (Schneider et al., 2012).

520

521 Phospho-histone H3 quantitation: All phospho-histone H3 quantitation was performed with the point tool  
522 feature of ImageJ (Schneider et al., 2012). In the forebrain, the phospho-histone H3 positive cells were  
523 quantified in different tissue compartments. The phospho-histone H3 images were merged with markers  
524 specific to each tissue: E-CADHERIN (surface ectoderm), and PDGFR $\alpha$  (mesenchyme). The  
525 neuroepithelium was identified morphologically. The dorsal telencephalic midline was excluded from this  
526 analysis. For the neural tube quantitation, the phospho-histone H3 cells were quantified in the ventral limit  
527 of expression of the NKX6.1 neural progenitors. Finally, in the forelimb bud, the phospho-histone H3  
528 positive cells were quantified specifically in a selected area of equal size in wildtype and mutant embryos.

529



530 Acknowledgements

531 We thank all current and past members of the Allen lab for valuable feedback and suggestions throughout  
532 the course of this study. In particular, we thank Nicole Franks and Savannah Struble for significant technical  
533 assistance. We also thank Michelle Lynch (University of Michigan) for assistance with scanning MicroCT  
534 samples and Thach-Vu Ho (University of Southern California) for assistance with generating the MicroCT  
535 3D reconstructions. We also gratefully acknowledge the Department of Cell and Developmental Biology,  
536 including the Engel, Spence, and O’Shea laboratories at the University of Michigan for providing access to  
537 research equipment. The NKX2.2 and NKX6.1 antibodies were obtained from the Developmental Studies  
538 Hybridoma Bank, created by the NICHD of the NIH and maintained at The University of Iowa, Department  
539 of Biology, Iowa City, IA 52242. Finally, we acknowledge the Biomedical Research Core Facilities  
540 Microscopy Core for providing access to confocal microscopy equipment, which is supported by the Rogel  
541 Cancer Center.

542

543 Competing Interests

544 The authors declare no competing or financial interests.

545

546 Funding

547 This work was supported by the National Science Foundation Graduate Research Fellowship Program  
548 [DGE1256260 to M.L.E.A.], Bradley M. Patten Fellowship [Department of Cell and Developmental Biology  
549 to M.L.E.A.], Rackham Merit Fellowship [Rackham Graduate School to M.L.E.A.], and the Center for  
550 Organogenesis T32 Training Grant [T32 HD007505 to M.L.E.A.]. This work was also supported by the  
551 National Institutes of Health [R01 DC014428, R01 CA198074, R01 118751 to B.L.A.]. Research reported  
552 in this publication was also supported by the University of Michigan Cancer Center Support Grant [P30  
553 CA046592] by the use of the following Cancer Center Shared Resource: Cell and Tissue Imaging.

554

555 Data Availability

556 This study did not generate/analyze any datasets.

557

558 References

- 559 **Allen, B. L., Song, J. Y., Izzi, L., Althaus, I. W., Kang, J. S., Charron, F., Krauss, R. S. and**  
560 **McMahon, A. P.** (2011). Overlapping roles and collective requirement for the coreceptors GAS1,  
561 CDO, and BOC in SHH pathway function. *Dev Cell* **20**, 775-787.
- 562 **Allen, B. L., Tenzen, T. and McMahon, A. P.** (2007). The Hedgehog-binding proteins Gas1 and Cdo  
563 cooperate to positively regulate Shh signaling during mouse development. *Genes Dev* **21**, 1244-  
564 1257.
- 565 **Aoto, K., Shikata, Y., Imai, H., Matsumaru, D., Tokunaga, T., Shioda, S., Yamada, G. and**  
566 **Motoyama, J.** (2009). Mouse Shh is required for prechordal plate maintenance during brain and  
567 craniofacial morphogenesis. *Dev Biol* **327**, 106-120.
- 568 **Bae, G. U., Domene, S., Roessler, E., Schachter, K., Kang, J. S., Muenke, M. and Krauss, R. S.** (2011).  
569 Mutations in CDON, encoding a hedgehog receptor, result in holoprosencephaly and defective  
570 interactions with other hedgehog receptors. *Am J Hum Genet* **89**, 231-240.
- 571 **Beachy, P. A., Hymowitz, S. G., Lazarus, R. A., Leahy, D. J. and Siebold, C.** (2010). Interactions  
572 between Hedgehog proteins and their binding partners come into view. *Genes Dev* **24**, 2001-2012.
- 573 **Bergeron, S. A., Tyurina, O. V., Miller, E., Bagas, A. and Karlstrom, R. O.** (2011). Brother of cdo  
574 (umleitung) is cell-autonomously required for Hedgehog-mediated ventral CNS patterning in the  
575 zebrafish. *Development* **138**, 75-85.
- 576 **Briscoe, J. and Therond, P. P.** (2013). The mechanisms of Hedgehog signalling and its roles in  
577 development and disease. *Nat Rev Mol Cell Biol* **14**, 416-429.
- 578 **Brugmann, S. A., Allen, N. C., James, A. W., Mekonnen, Z., Madan, E. and Helms, J. A.** (2010). A  
579 primary cilia-dependent etiology for midline facial disorders. *Hum Mol Genet* **19**, 1577-1592.
- 580 **Cabrera, J. R., Sanchez-Pulido, L., Rojas, A. M., Valencia, A., Manes, S., Naranjo, J. R. and**  
581 **Mellstrom, B.** (2006). Gas1 is related to the glial cell-derived neurotrophic factor family receptors  
582 alpha and regulates Ret signaling. *J Biol Chem* **281**, 14330-14339.
- 583 **Cardozo, M. J., Sanchez-Arrones, L., Sandonis, A., Sanchez-Camacho, C., Gestri, G., Wilson, S. W.,**  
584 **Guerrero, I. and Bovolenta, P.** (2014). Cdon acts as a Hedgehog decoy receptor during proximal-  
585 distal patterning of the optic vesicle. *Nat Commun* **5**, 4272.
- 586 **Chiang, C., Litingtung, Y., Lee, E., Young, K. E., Corden, J. L., Westphal, H. and Beachy, P. A.**  
587 (1996). Cyclopia and defective axial patterning in mice lacking Sonic hedgehog gene function.  
588 *Nature* **383**, 407-413.
- 589 **Cobourne, M. T., Miletich, I. and Sharpe, P. T.** (2004). Restriction of sonic hedgehog signalling during  
590 early tooth development. *Development* **131**, 2875-2885.
- 591 **Cole, F. and Krauss, R. S.** (2003). Microform holoprosencephaly in mice that lack the Ig superfamily  
592 member Cdon. *Curr Biol* **13**, 411-415.
- 593 **Cordero, D., Marcucio, R., Hu, D., Gaffield, W., Tapadia, M. and Helms, J. A.** (2004). Temporal  
594 perturbations in sonic hedgehog signaling elicit the spectrum of holoprosencephaly phenotypes. *J*  
595 *Clin Invest* **114**, 485-494.
- 596 **Dai, P., Akimaru, H., Tanaka, Y., Maekawa, T., Nakafuku, M. and Ishii, S.** (1999). Sonic Hedgehog-  
597 induced activation of the Gli1 promoter is mediated by GLI3. *J Biol Chem* **274**, 8143-8152.
- 598 **Dessaud, E., McMahon, A. P. and Briscoe, J.** (2008). Pattern formation in the vertebrate neural tube: a  
599 sonic hedgehog morphogen-regulated transcriptional network. *Development* **135**, 2489-2503.
- 600 **Ho, T. V., Iwata, J., Ho, H. A., Grimes, W. C., Park, S., Sanchez-Lara, P. A. and Chai, Y.** (2015).  
601 Integration of comprehensive 3D microCT and signaling analysis reveals differential regulatory  
602 mechanisms of craniofacial bone development. *Dev Biol* **400**, 180-190.
- 603 **Holtz, A. M., Peterson, K. A., Nishi, Y., Morin, S., Song, J. Y., Charron, F., McMahon, A. P. and**  
604 **Allen, B. L.** (2013). Essential role for ligand-dependent feedback antagonism of vertebrate hedgehog  
605 signaling by PTCH1, PTCH2 and HHIP1 during neural patterning. *Development* **140**, 3423-3434.
- 606 **Hong, M. and Krauss, R. S.** (2018). Modeling the complex etiology of holoprosencephaly in mice. *Am J*  
607 *Med Genet C Semin Med Genet* **178**, 140-150.



- 608 **Hong, M., Srivastava, K., Kim, S., Allen, B. L., Leahy, D. J., Hu, P., Roessler, E., Krauss, R. S. and**  
609 **Muenke, M.** (2017). BOC is a modifier gene in holoprosencephaly. *Hum Mutat* **38**, 1464-1470.
- 610 **Hu, D. and Helms, J. A.** (1999). The role of sonic hedgehog in normal and abnormal craniofacial  
611 morphogenesis. *Development* **126**, 4873-4884.
- 612 **Hui, C. C. and Angers, S.** (2011). Gli proteins in development and disease. *Annu Rev Cell Dev Biol* **27**,  
613 513-537.
- 614 **Izzi, L., Levesque, M., Morin, S., Laniel, D., Wilkes, B. C., Mille, F., Krauss, R. S., McMahon, A. P.,**  
615 **Allen, B. L. and Charron, F.** (2011). Boc and Gas1 each form distinct Shh receptor complexes with  
616 Ptch1 and are required for Shh-mediated cell proliferation. *Dev Cell* **20**, 788-801.
- 617 **Jeong, J., Mao, J., Tenzen, T., Kottmann, A. H. and McMahon, A. P.** (2004). Hedgehog signaling in the  
618 neural crest cells regulates the patterning and growth of facial primordia. *Genes Dev* **18**, 937-951.
- 619 **Jiang, R., Bush, J. O. and Lidral, A. C.** (2006). Development of the upper lip: morphogenetic and  
620 molecular mechanisms. *Dev Dyn* **235**, 1152-1166.
- 621 **Kang, J. S., Gao, M., Feinleib, J. L., Cotter, P. D., Guadagno, S. N. and Krauss, R. S.** (1997). CDO: an  
622 oncogene-, serum-, and anchorage-regulated member of the Ig/fibronectin type III repeat family. *J*  
623 *Cell Biol* **138**, 203-213.
- 624 **Kang, J. S., Mulieri, P. J., Hu, Y., Taliana, L. and Krauss, R. S.** (2002). BOC, an Ig superfamily  
625 member, associates with CDO to positively regulate myogenic differentiation. *EMBO J* **21**, 114-124.
- 626 **Krauss, R. S.** (2007). Holoprosencephaly: new models, new insights. *Expert Rev Mol Med* **9**, 1-17.
- 627 **Kuwajima, T., Sitko, A. A., Bhansali, P., Jurgens, C., Guido, W. and Mason, C.** (2013). ClearT: a  
628 detergent- and solvent-free clearing method for neuronal and non-neuronal tissue. *Development* **140**,  
629 1364-1368.
- 630 **Lee, C. S., Buttitta, L. and Fan, C. M.** (2001). Evidence that the WNT-inducible growth arrest-specific  
631 gene 1 encodes an antagonist of sonic hedgehog signaling in the somite. *Proc Natl Acad Sci U S A*  
632 **98**, 11347-11352.
- 633 **Lei, Q., Jeong, Y., Misra, K., Li, S., Zelman, A. K., Epstein, D. J. and Matisse, M. P.** (2006). Wnt  
634 signaling inhibitors regulate the transcriptional response to morphogenetic Shh-Gli signaling in the  
635 neural tube. *Dev Cell* **11**, 325-337.
- 636 **Lum, L., Yao, S., Mozer, B., Rovescalli, A., Von Kessler, D., Nirenberg, M. and Beachy, P. A.** (2003).  
637 Identification of Hedgehog pathway components by RNAi in Drosophila cultured cells. *Science* **299**,  
638 2039-2045.
- 639 **Makihara, S., Morin, S., Ferent, J., Cote, J. F., Yam, P. T. and Charron, F.** (2018). Polarized Dock  
640 Activity Drives Shh-Mediated Axon Guidance. *Dev Cell* **46**, 410-425 e417.
- 641 **Marcucio, R. S., Cordero, D. R., Hu, D. and Helms, J. A.** (2005). Molecular interactions coordinating the  
642 development of the forebrain and face. *Dev Biol* **284**, 48-61.
- 643 **Marigo, V., Davey, R. A., Zuo, Y., Cunningham, J. M. and Tabin, C. J.** (1996). Biochemical evidence  
644 that patched is the Hedgehog receptor. *Nature* **384**, 176-179.
- 645 **Martinelli, D. C. and Fan, C. M.** (2007). Gas1 extends the range of Hedgehog action by facilitating its  
646 signaling. *Genes Dev* **21**, 1231-1243.
- 647 **McLellan, J. S., Zheng, X., Hauk, G., Ghirlando, R., Beachy, P. A. and Leahy, D. J.** (2008). The mode  
648 of Hedgehog binding to Ihog homologues is not conserved across different phyla. *Nature* **455**, 979-  
649 983.
- 650 **McMahon, A. P., Ingham, P. W. and Tabin, C. J.** (2003). Developmental roles and clinical significance  
651 of hedgehog signaling. *Curr Top Dev Biol* **53**, 1-114.
- 652 **Muenke, M. and Beachy, P. A.** (2000). Genetics of ventral forebrain development and holoprosencephaly.  
653 *Curr Opin Genet Dev* **10**, 262-269.
- 654 **Ohazama, A., Haycraft, C. J., Seppala, M., Blackburn, J., Ghafoor, S., Cobourne, M., Martinelli, D.**  
655 **C., Fan, C. M., Peterkova, R., Lesot, H., et al.** (2009). Primary cilia regulate Shh activity in the  
656 control of molar tooth number. *Development* **136**, 897-903.
- 657 **Okada, A., Charron, F., Morin, S., Shin, D. S., Wong, K., Fabre, P. J., Tessier-Lavigne, M. and**  
658 **McConnell, S. K.** (2006). Boc is a receptor for sonic hedgehog in the guidance of commissural  
659 axons. *Nature* **444**, 369-373.

- 660 **Pabst, O., Herbrand, H., Takuma, N. and Arnold, H. H.** (2000). NKX2 gene expression in  
661 neuroectoderm but not in mesodermally derived structures depends on sonic hedgehog in mouse  
662 embryos. *Dev Genes Evol* **210**, 47-50.
- 663 **Ribeiro, L. A., Queizi, R. G., Nascimento, A., Bertolacini, C. P. and Richieri-Costa, A.** (2010).  
664 Holoprosencephaly and holoprosencephaly-like phenotype and GAS1 DNA sequence changes:  
665 Report of four Brazilian patients. *Am J Med Genet A* **152A**, 1688-1694.
- 666 **Roessler, E., El-Jaick, K. B., Dubourg, C., Velez, J. I., Solomon, B. D., Pineda-Alvarez, D. E.,**  
667 **Lachawan, F., Zhou, N., Ouspenskaia, M., Paulussen, A., et al.** (2009). The mutational spectrum  
668 of holoprosencephaly-associated changes within the SHH gene in humans predicts loss-of-function  
669 through either key structural alterations of the ligand or its altered synthesis. *Hum Mutat* **30**, E921-  
670 935.
- 671 **Roessler, E. and Muenke, M.** (2010). The molecular genetics of holoprosencephaly. *Am J Med Genet C*  
672 *Semin Med Genet* **154C**, 52-61.
- 673 **Rubenstein, J. L. and Beachy, P. A.** (1998). Patterning of the embryonic forebrain. *Curr Opin Neurobiol*  
674 **8**, 18-26.
- 675 **Schachter, K. A. and Krauss, R. S.** (2008). Murine models of holoprosencephaly. In *Curr Top Dev Biol*,  
676 pp. 139-170.
- 677 **Schneider, C. A., Rasband, W. S. and Eliceiri, K. W.** (2012). NIH Image to ImageJ: 25 years of image  
678 analysis. *Nat Methods* **9**, 671-675.
- 679 **Seppala, M., Depew, M. J., Martinelli, D. C., Fan, C. M., Sharpe, P. T. and Cobourne, M. T.** (2007).  
680 Gas1 is a modifier for holoprosencephaly and genetically interacts with sonic hedgehog. *J Clin*  
681 *Invest* **117**, 1575-1584.
- 682 **Seppala, M., Xavier, G. M., Fan, C. M. and Cobourne, M. T.** (2014). Boc modifies the spectrum of  
683 holoprosencephaly in the absence of Gas1 function. *Biol Open* **3**, 728-740.
- 684 **Tenzen, T., Allen, B. L., Cole, F., Kang, J. S., Krauss, R. S. and McMahon, A. P.** (2006). The cell  
685 surface membrane proteins Cdo and Boc are components and targets of the Hedgehog signaling  
686 pathway and feedback network in mice. *Dev Cell* **10**, 647-656.
- 687 **Vuong, T. A., Leem, Y. E., Kim, B. G., Cho, H., Lee, S. J., Bae, G. U. and Kang, J. S.** (2017). A Sonic  
688 hedgehog coreceptor, BOC regulates neuronal differentiation and neurite outgrowth via interaction  
689 with ABL and JNK activation. *Cell Signal* **30**, 30-40.
- 690 **Wang, H., Lei, Q., Oosterveen, T., Ericson, J. and Matise, M. P.** (2011). Tcf/Lef repressors differentially  
691 regulate Shh-Gli target gene activation thresholds to generate progenitor patterning in the developing  
692 CNS. *Development* **138**, 3711-3721.
- 693 **Wilkinson, D. G.** (1992). *In situ hybridization : a practical approach*. Oxford ; New York: IRL Press at  
694 Oxford University Press.
- 695 **Xavier, G. M., Seppala, M., Barrell, W., Birjandi, A. A., Geoghegan, F. and Cobourne, M. T.** (2016a).  
696 Hedgehog receptor function during craniofacial development. *Dev Biol* **415**, 198-215.
- 697 **Xavier, G. M., Seppala, M., Papageorgiou, S. N., Fan, C. M. and Cobourne, M. T.** (2016b). Genetic  
698 interactions between the hedgehog co-receptors Gas1 and Boc regulate cell proliferation during  
699 murine palatogenesis. *Oncotarget* **7**, 79233-79246.
- 700 **Xie, J., Murone, M., Luoh, S. M., Ryan, A., Gu, Q., Zhang, C., Bonifas, J. M., Lam, C. W., Hynes, M.,**  
701 **Goddard, A., et al.** (1998). Activating Smoothed mutations in sporadic basal-cell carcinoma.  
702 *Nature* **391**, 90-92.
- 703 **Xu, J., Liu, H., Lan, Y., Adam, M., Clouthier, D. E., Potter, S. and Jiang, R.** (2019). Hedgehog  
704 signaling patterns the oral-aboral axis of the mandibular arch. *Elife* **8**.
- 705 **Yao, S., Lum, L. and Beachy, P.** (2006). The ihog cell-surface proteins bind Hedgehog and mediate  
706 pathway activation. *Cell* **125**, 343-357.
- 707 **Zhang, W., Hong, M., Bae, G. U., Kang, J. S. and Krauss, R. S.** (2011). Boc modifies the  
708 holoprosencephaly spectrum of Cdo mutant mice. *Dis Model Mech* **4**, 368-380.
- 709 **Zhang, W., Kang, J. S., Cole, F., Yi, M. J. and Krauss, R. S.** (2006). Cdo functions at multiple points in  
710 the Sonic Hedgehog pathway, and Cdo-deficient mice accurately model human holoprosencephaly.  
711 *Dev Cell* **10**, 657-665.

712 Figure Legends

713 **Figure 1. The HH co-receptors *Gas1*, *Cdon* and *Boc* are expressed throughout early craniofacial**  
714 **development.**

715 Analysis of HH co-receptor expression using *lacZ* (*Gas1*, *Cdon*) and *hPLAP* (*Boc*) reporter alleles (A-T).  
716 Whole mount X-Gal and Alkaline Phosphatase staining of E8.5 (A-D), E9.5 (E-H), and E10.5 (I-L),  
717 wildtype (A, E, I, M, Q), *Gas1*<sup>lacZ/+</sup> (B, F, J, N, R), *Cdon*<sup>lacZ/+</sup> (C, G, K, O, S), and *Boc*<sup>AP/+</sup> (D, H, L, P, T)  
718 embryos is shown. Somite number (s) is indicated in the lower right corner of each panel. Frontal view of  
719 craniofacial structures of E10.5 embryos (M-P). White arrows denote LNP and MNP and yellow arrows  
720 denote MXP and MP (M). Coronal sections of E10.5 telencephala (Q-T); arrowhead denotes a subset of  
721 cells expressing *Cdon* in the olfactory epithelium. Scale bars, (A-P) 500  $\mu$ m and (Q-T) 200  $\mu$ m.  
722 Abbreviations: cranial neural fold (CNF), somites (S), neural tube (NT), pre-chordal plate (PCP),  
723 frontonasal prominence (FNP), maxillary process (MXP), mandibular process (MP), telencephalon (T),  
724 forelimb (FL), hindlimb (HL), medial nasal process (MNP), lateral nasal process (LNP), surface ectoderm  
725 (SE), neuroepithelium (NE) and olfactory epithelium (OE).

726

727 **Figure 2. Loss of *Boc* results in midface widening at E10.5 on a congenic C57BL/6J background.**

728 En face view of E10.5 mouse embryos (A-L). Somite number (s) is indicated in the lower right corner of  
729 each panel. Brackets indicate internasal distance. Black triangles denote fusion of the MNP. E10.5 wildtype  
730 (A,E,I), *Gas1*<sup>-/-</sup> (B-D), *Cdon*<sup>-/-</sup> (F-H), and *Boc*<sup>-/-</sup> (J-L) embryos. Note that *Gas1* and *Cdon* mutants display a  
731 range of craniofacial defects (increasing in severity from left to right), while *Boc* mutants do not display any  
732 gross morphological changes. Scale bar (A), 500  $\mu$ m. Telencephalic vesicle (TV) division frequency in  
733 E10.5 wildtype, *Gas1*<sup>-/-</sup>, *Cdon*<sup>-/-</sup>, and *Boc*<sup>-/-</sup> embryos (M). TV division was classified according to the  
734 following categories: normal division, incomplete division and no division (see Fig. S2A-C for a  
735 representative example of each category). Medial nasal process (MNP) separation frequency in E10.5  
736 wildtype, *Gas1*<sup>-/-</sup>, *Cdon*<sup>-/-</sup>, and *Boc*<sup>-/-</sup> embryos (N). MNP separation in each embryo was classified according  
737 to the following categories: normal separation, reduced separation, incomplete separation and no separation  
738 (see Fig. S2D-G for a representative example of each category). Internasal distance quantitation in wildtype  
739 (n= 23), *Gas1*<sup>-/-</sup> (n=17), *Cdon*<sup>-/-</sup> (n=12), *Boc*<sup>-/-</sup> (n=36) embryos (O; in  $\mu$ m). Data are represented as the mean  
740  $\pm$  standard deviation. P-values were determined by a two-tailed Student's *t*-test.

741

742 **Figure 3. Tissue-specific rescue of HH signaling in E10.5 *Gas1*;*Boc* double mutant embryos.**

743 En face view of E10.5 embryos (A-D). Somite number (s) is indicated in the lower right corner of each  
744 panel. Brackets indicate internasal distance. Black triangles denote fusion of the medial nasal process. E10.5  
745 wildtype (A), *Gas1*<sup>-/-</sup> (B), *Boc*<sup>-/-</sup> (C), and *Gas1*<sup>-/-</sup>;*Boc*<sup>-/-</sup> (D) embryos. Telencephalic vesicle (TV) division

746 frequency in E10.5 wildtype,  $Gas1^{-/-}$ ,  $Boc^{-/-}$ , and  $Gas1^{-/-};Boc^{-/-}$  embryos (E). TV division was classified  
747 according to the following categories: normal division, incomplete division and no division (see Fig. S2A-  
748 C for representative examples of each category). Medial nasal process (MNP) separation frequency in E10.5  
749 wildtype,  $Gas1^{-/-}$ ,  $Boc^{-/-}$ , and  $Gas1^{-/-};Boc^{-/-}$  embryos (F). MNP separation in each embryo was classified  
750 according to the following categories: normal separation, reduced separation, incomplete separation and no  
751 separation (see Fig. S2D-G for representative examples of each category). *In situ* hybridization detection of  
752 *Gli1* expression in E10.5 forebrains (G-J) and their corresponding forelimbs (G'-J'). White arrowheads  
753 denote *Gli1* expression in the MNP (G,I); red arrowhead indicates the absence of *Gli1* expression (H);  
754 yellow arrowhead marks partial rescue of *Gli1* expression (J). En face view of E10.5 forebrains and dorsal  
755 view of E10.5 forelimbs in wildtype (G, G'),  $Gas1^{-/-}$  (H,H'),  $Boc^{-/-}$  (I,I'), and  $Gas1^{-/-};Boc^{-/-}$  (J,J') embryos.  
756 Somite number (s) is indicated in the lower right corner of each panel. Black dotted lines outline nasal  
757 processes. Note that *Gli1* is differentially regulated in the MNP and forelimb of *Gas1;Boc* mutants. Scale  
758 bar in (A) and (G), 500 $\mu$ m; (G'), 100 $\mu$ m.

759

760 **Figure 4. Selective contribution of *Boc* to patterning of the neural tube, but not the forebrain**  
761 **neuroepithelium.**

762 En face view of E10.5 embryos (A-D). Somite number (s) is indicated in the lower right corner of each  
763 panel. Brackets indicate internasal distance. Black triangles denote fusion of the MNP. E10.5 wildtype (A),  
764  $Gas1^{-/-}$  (B),  $Boc^{-/-}$  (C), and  $Gas1^{-/-};Boc^{-/-}$  (D) embryos are shown. Whole-mount immunofluorescent antibody  
765 detection of E-CADHERIN (green; E-H) and NKX2.1 (red; E-H) in E10.5 wildtype (E),  $Gas1^{-/-}$  (F),  $Boc^{-/-}$   
766 (G), and  $Gas1^{-/-};Boc^{-/-}$  (H) embryos. Antibody detection of OLIG2 (green; I-L) and NKX2.2 (red; I-L) in  
767 transverse sections of E10.5 forelimb level neural tubes from wildtype (I),  $Gas1^{-/-}$  (J),  $Boc^{-/-}$  (K), and  $Gas1^{-/-}$   
768  $;Boc^{-/-}$  (L) embryos. Quantitation of NKX2.1 expression in wildtype (n=4),  $Gas1^{-/-}$  (n=5),  $Boc^{-/-}$  (n=6), and  
769  $Gas1^{-/-};Boc^{-/-}$  (n=5) embryos (M). Quantitation of NKX2.2+ cells (2 sections/embryo) for wildtype (n=7),  
770  $Gas1^{-/-}$  (n=5),  $Boc^{-/-}$  (n=7), and  $Gas1^{-/-};Boc^{-/-}$  (n=5) embryos (N). Data are presented as mean  $\pm$  standard  
771 deviation. P-values were determined by two-tailed Student's *t*-test. Note that NKX2.2+ cells are only  
772 present in a subset of sections from  $Gas1^{-/-};Boc^{-/-}$  embryos (inset in L). Scale bars in (A) and (E), 500 $\mu$ m;  
773 (I), 25  $\mu$ m.

774

775 **Figure 5. Partial rescue of HPE phenotypes persists through E18.5 in *Gas1;Boc* mutant embryos.**

776 En face view of E18.5 wildtype (A,M),  $Gas1^{-/-}$  (B,N),  $Boc^{-/-}$  (C,O), and  $Gas1^{-/-};Boc^{-/-}$  (D,P) embryos. Black  
777 arrowheads denote the nasal pits (NP), white arrowheads mark the maxilla (MX), and yellow arrowheads  
778 identify the mandible (M). E18.5 craniofacial structures stained with alcian blue and alizarin red to visualize  
779 cartilage and bone, respectively (E-L). Dorsal views of the nasal capsule (NC) and premaxilla (PMX) of  
780 E18.5 wildtype (E),  $Gas1^{-/-}$  (F),  $Boc^{-/-}$  (G), and  $Gas1^{-/-};Boc^{-/-}$  (H) are shown. Black arrowheads indicate the



781 nasal capsule and red arrowheads mark the premaxilla. Dorsal views of the mandible of E18.5, wildtype (I),  
782 *Gas1*<sup>-/-</sup> (J), *Boc*<sup>-/-</sup> (K), and *Gas1*<sup>-/-</sup>;*Boc*<sup>-/-</sup> (L) are shown. Asterisks identify ectopic bone duplications in the  
783 posterior part of the mandible and black arrows denote Meckel's cartilage (MC). Inset in J, shows ectopic  
784 bone in a *Gas1*<sup>-/-</sup> mutant embryo. Three dimensional reconstructions of microCT images of isolated nasal  
785 bones from E18.5 wildtype (M'), *Gas1*<sup>-/-</sup> (N'), *Boc*<sup>-/-</sup> (O'), and *Gas1*<sup>-/-</sup>;*Boc*<sup>-/-</sup> (P') embryos. A←→P specifies  
786 the anterior to posterior axis in (E-H, I-L, M'-P'). Scale bars (A, E, I, M, M'), 500µm.

787

788 **Figure 6. *Boc* selectively inhibits mesenchymal proliferation during craniofacial development.**

789 Immunofluorescent analysis of proliferation in E10.5 telencephalon coronal sections from wildtype (A),  
790 *Gas1*<sup>-/-</sup> (B), *Cdon*<sup>-/-</sup> (C), *Boc*<sup>-/-</sup> (D), and *Gas1*<sup>-/-</sup>;*Boc*<sup>-/-</sup> (E) embryos. Antibody detection of E-CADHERIN  
791 (ECAD, green), PDGFRα (blue) and phospho-histone H3 (PH3, red). Quantitation of PH3+ cells (2  
792 sections/embryo) in the surface ectoderm (F), forebrain neuroepithelium (G), and craniofacial mesenchyme  
793 (H), of E10.5 wildtype (n=6), *Gas1*<sup>-/-</sup> (n=5), *Boc*<sup>-/-</sup> (n=6), and *Gas1*<sup>-/-</sup>;*Boc*<sup>-/-</sup> (n=4). Data are presented as  
794 mean ± standard deviation. P-values were determined by two-tailed Student's *t*-test. Note that *Boc*<sup>-/-</sup>  
795 embryos display increased proliferation in the craniofacial mesenchyme (H). Scale bar (A), 50 µm.

796

797 **Figure 7. BOC is a multi-functional regulator of HH signaling.**

798 Summary of BOC contributions to HH signaling (A). Green indicates promotion of HH signaling, red  
799 denotes HH pathway antagonism, gray suggests no effect, and yellow is unknown. Proposed mechanisms of  
800 action for BOC in HH signal transduction (B). 1. Complex formation with PTCH1. The interaction of  
801 PTCH1 and BOC that allows the formation of a receptor complex that alternately activates or inhibits HH  
802 pathway activity. 2. Ligand sequestration. BOC binds HH ligands through its extracellular domain and  
803 could antagonize HH signaling by sequestering SHH in areas of low SHH concentration. 3. Cytoplasmic  
804 domain contributions. The unique cytoplasmic domain of BOC could regulate additional downstream  
805 signaling cascades that enable its tissue-specific functions. 4. HH-independent activity. BOC could mediate  
806 yet to be identified HH-independent functions that either augment or counter the HH response.

807

The HH co-receptors *Gas1*, *Cdon* and *Boc* are expressed throughout early craniofacial development.

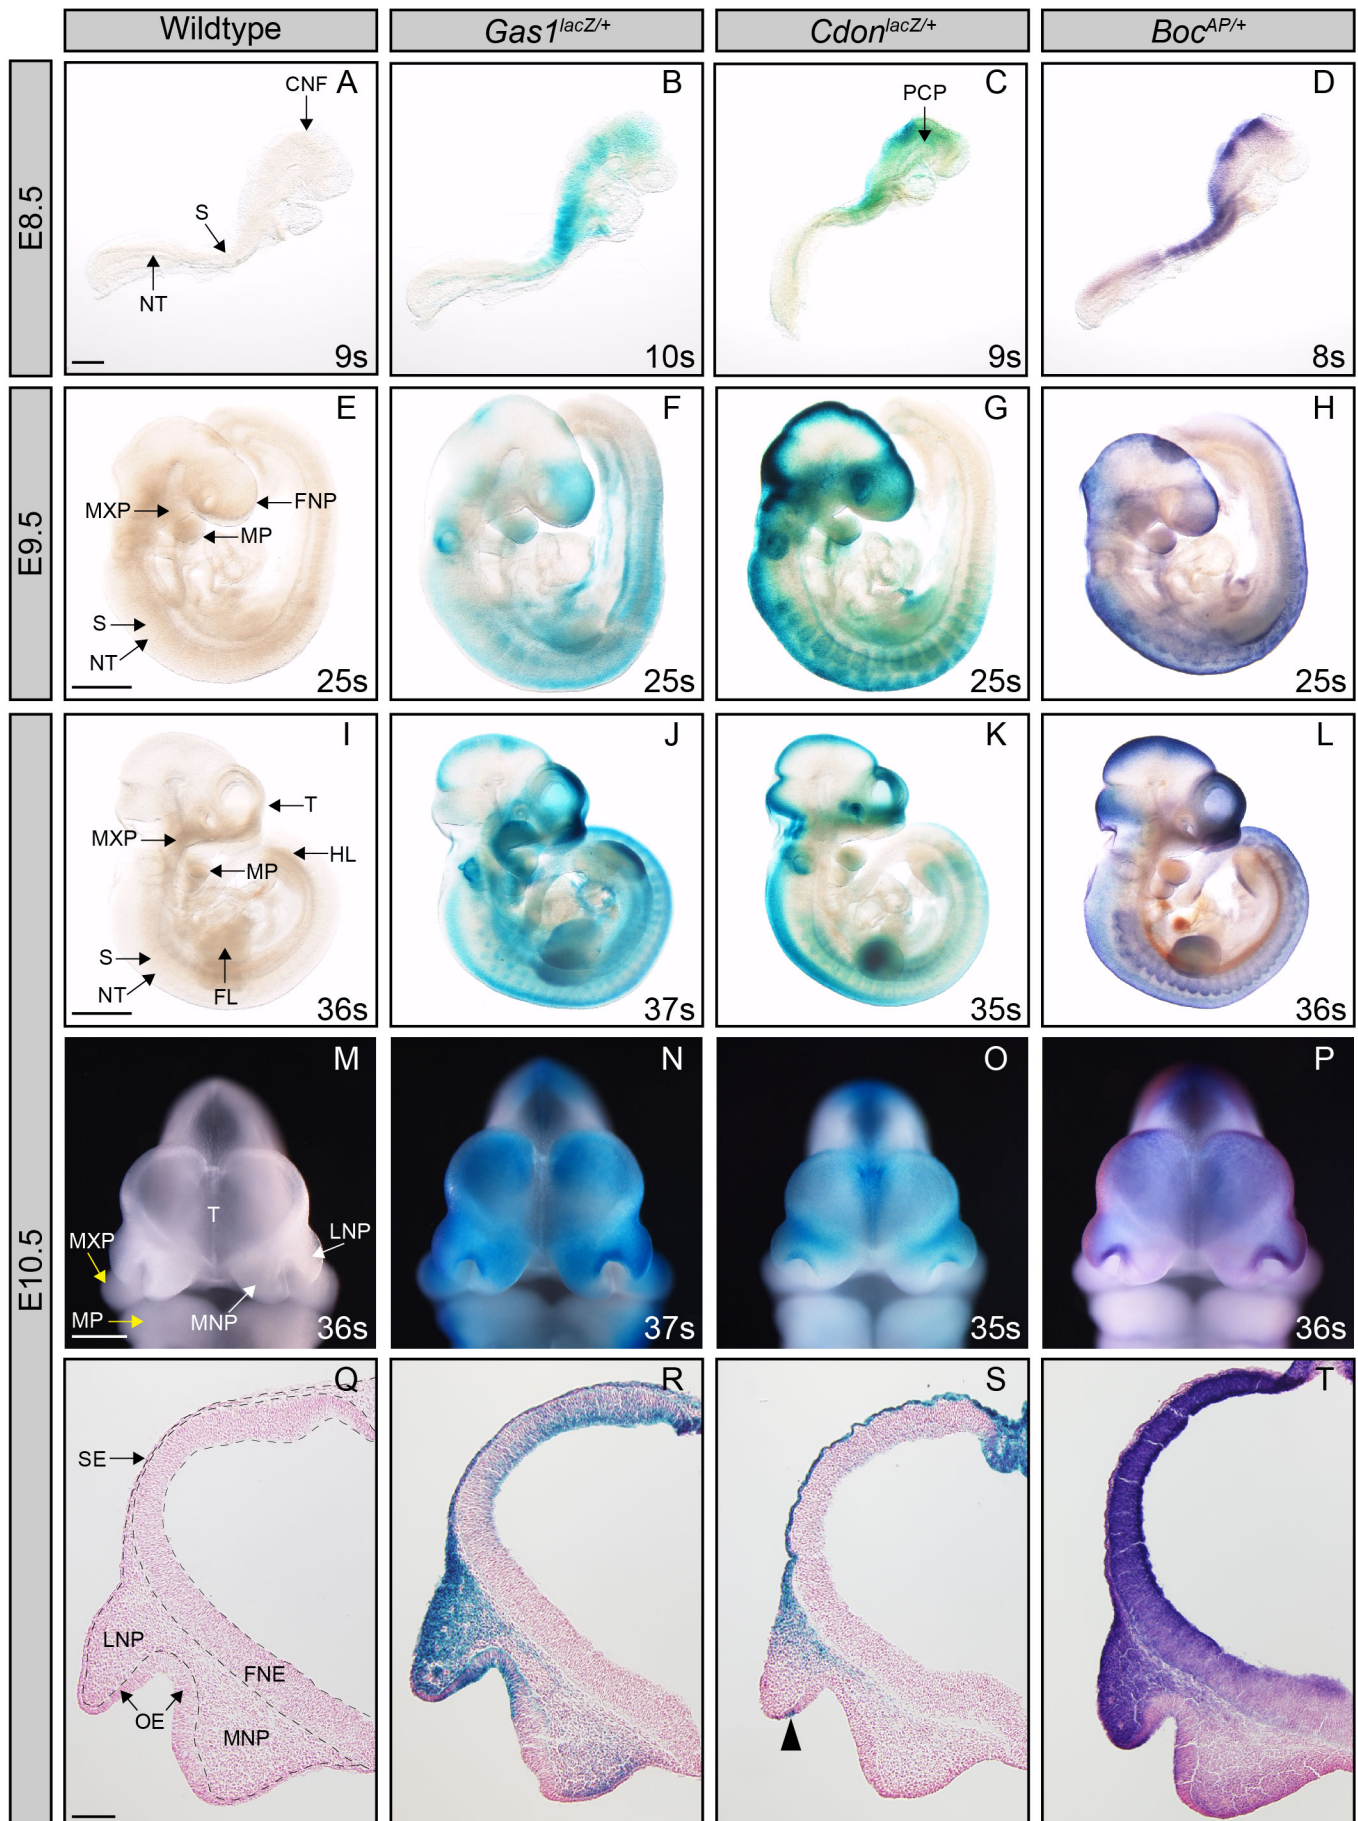

Loss of *Boc* results in midface widening at E10.5 on a congenic C57BL/6J background.

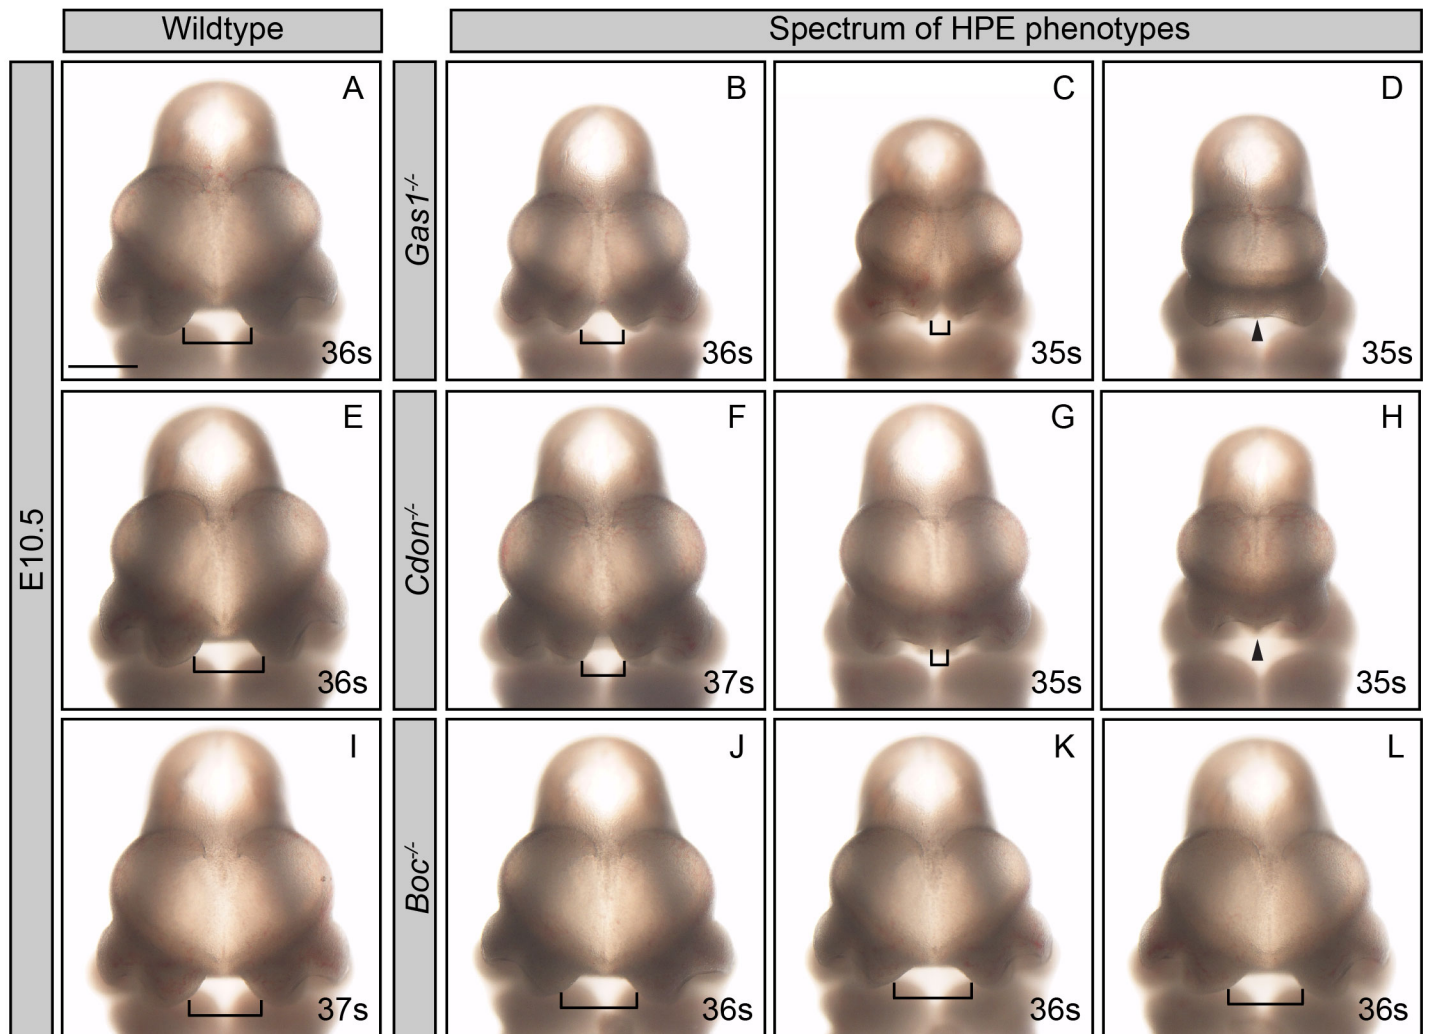

M Telencephalic Vesicle Division

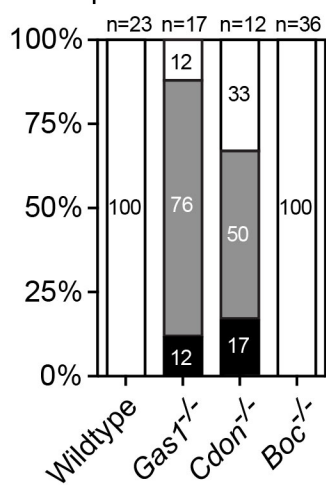

Normal division  
 Incomplete division  
 No division

N MNP Separation

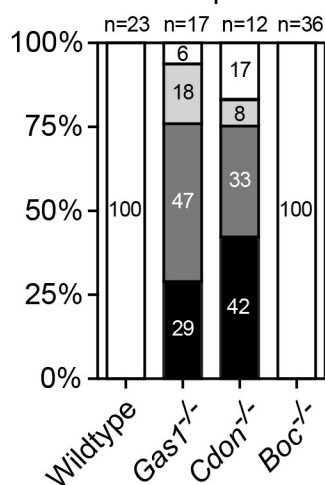

Normal separation  
 Reduced separation  
 Incomplete separation  
 No separation

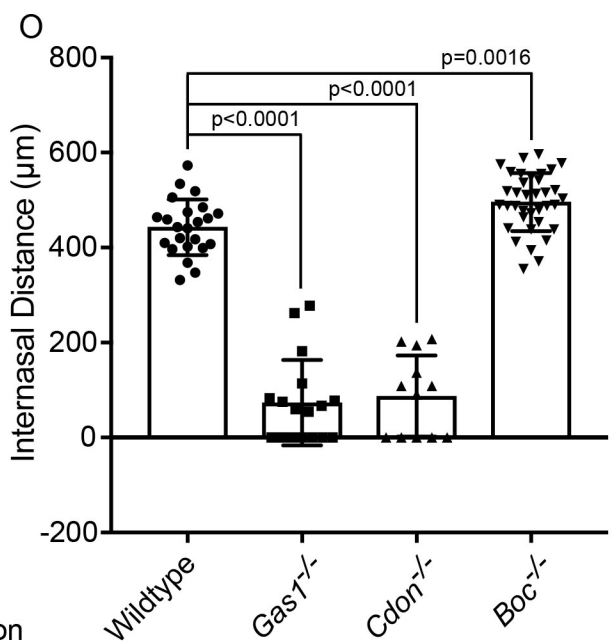



Tissue-specific rescue of HH signaling in E10.5 *Gas1*;*Boc* double mutant embryos.

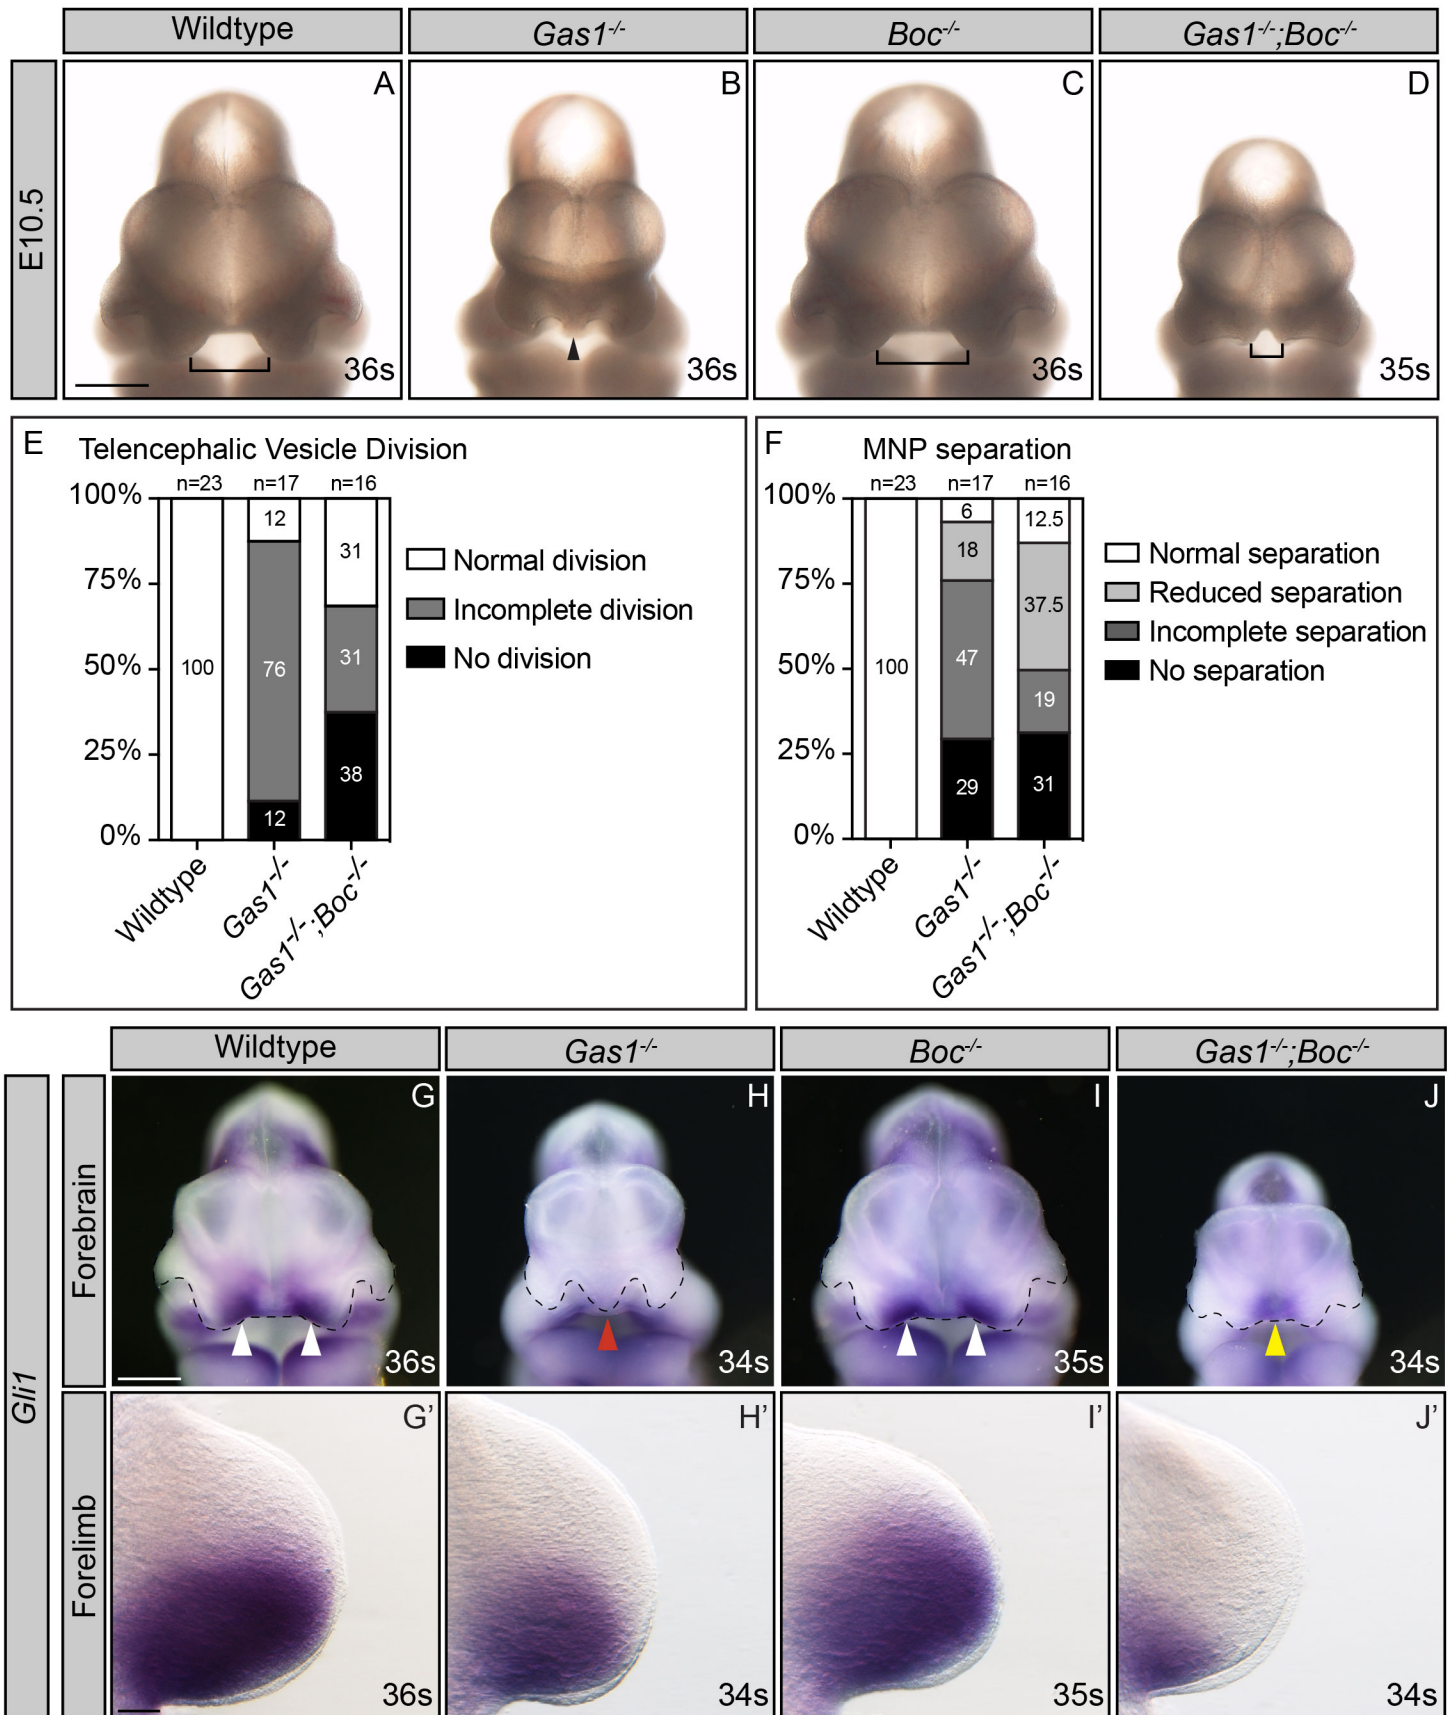



Selective contribution of *Boc* to patterning of the neural tube, but not the forebrain neuroepithelium.

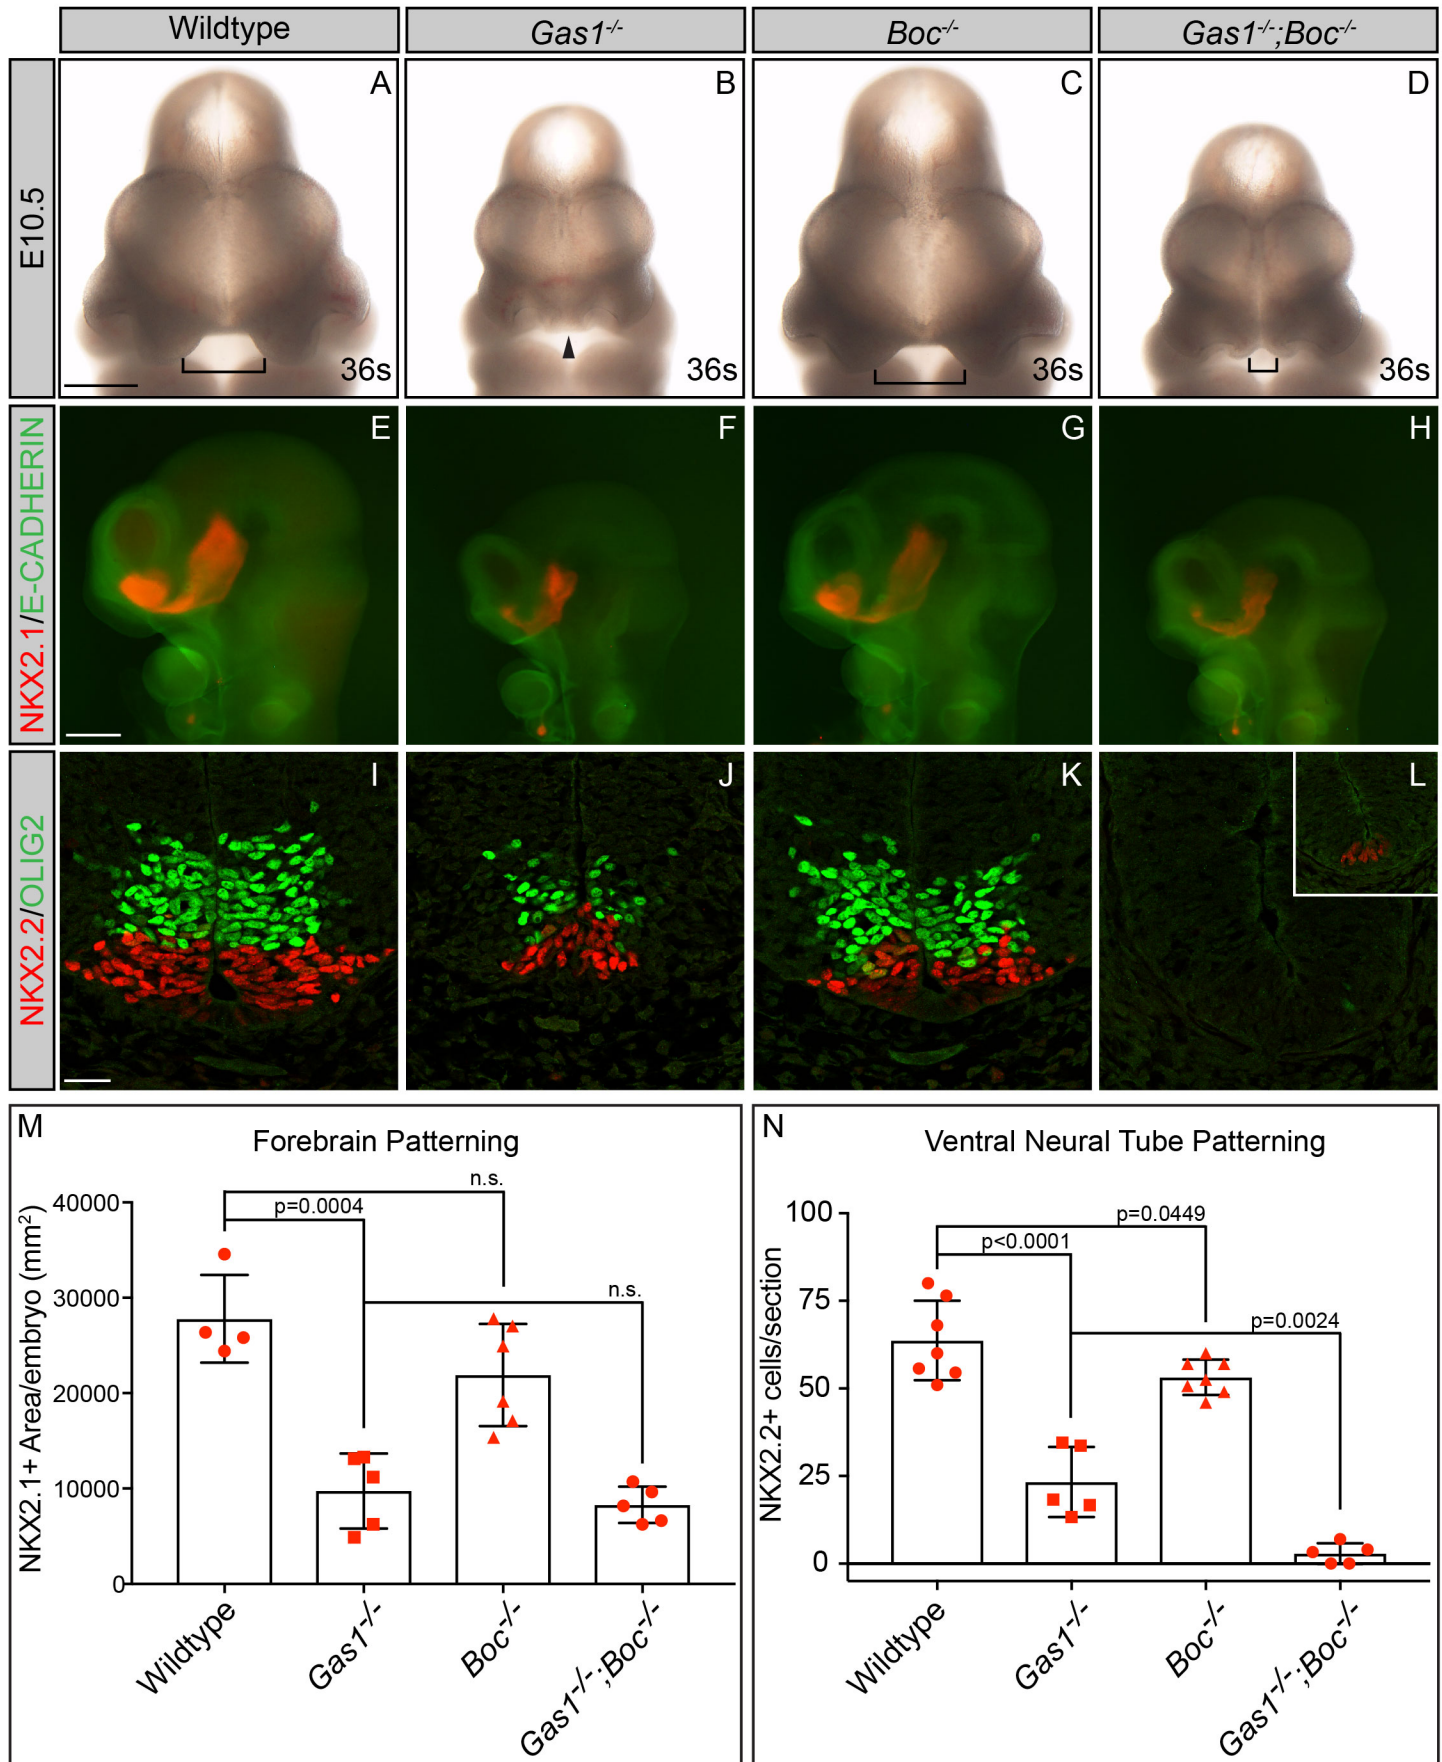

Partial rescue of HPE phenotypes persists through E18.5 in *Gas1*;*Boc* mutant embryos.

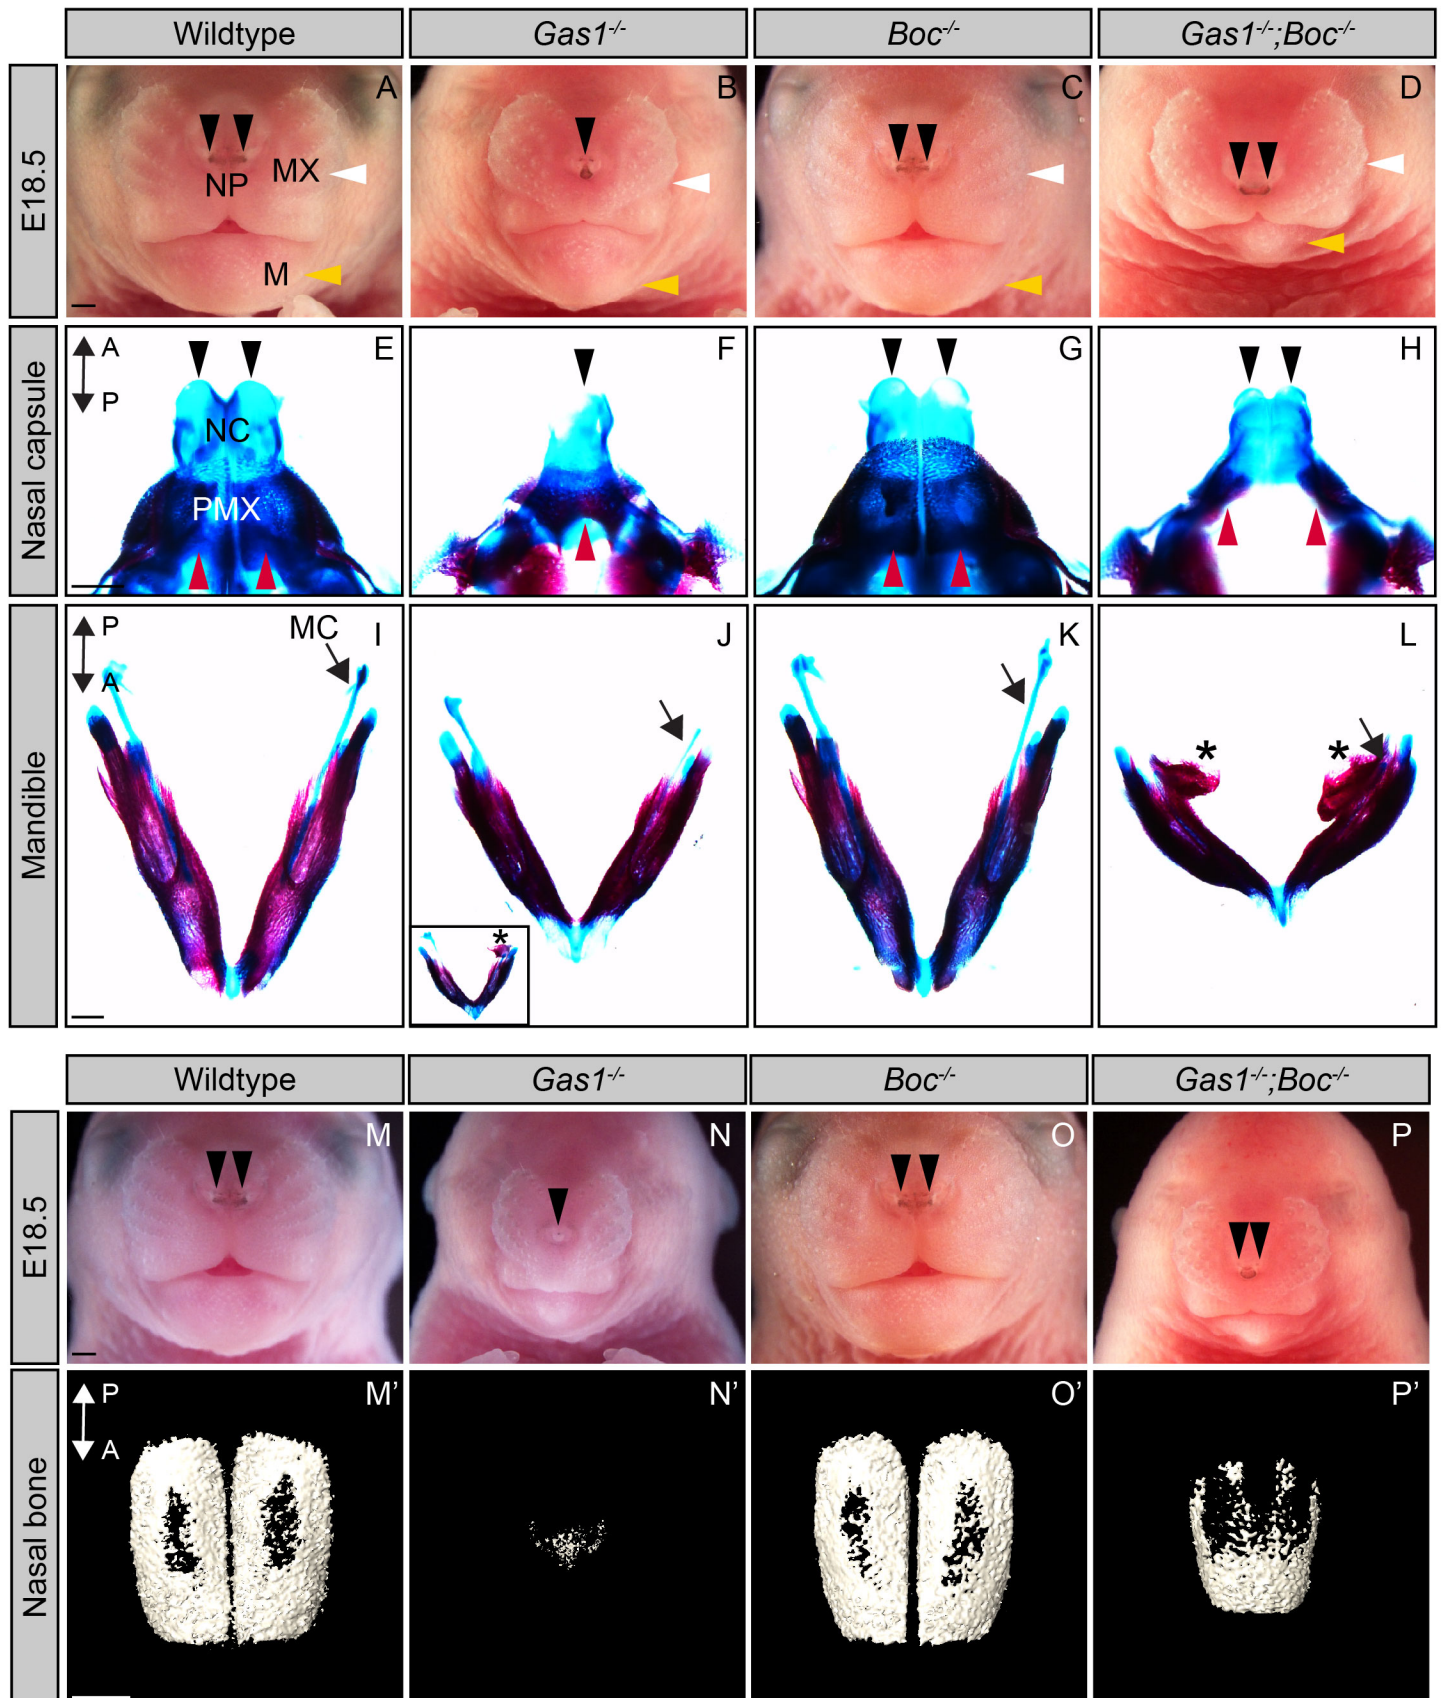



*Boc* selectively inhibits mesenchymal proliferation during craniofacial development.

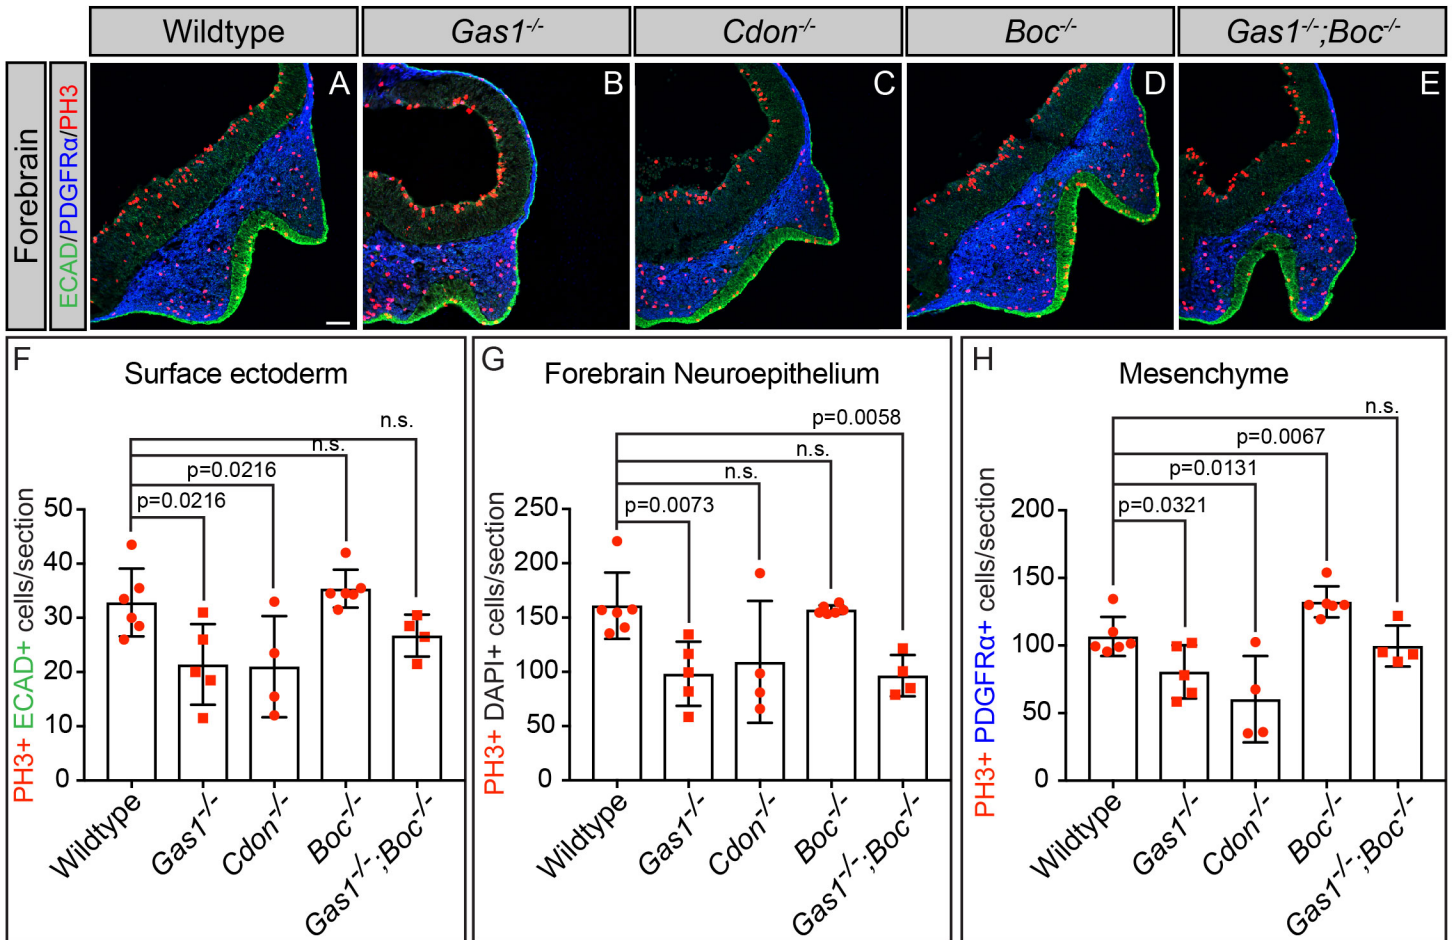

BOC is a multi-functional regulator of HH signaling.

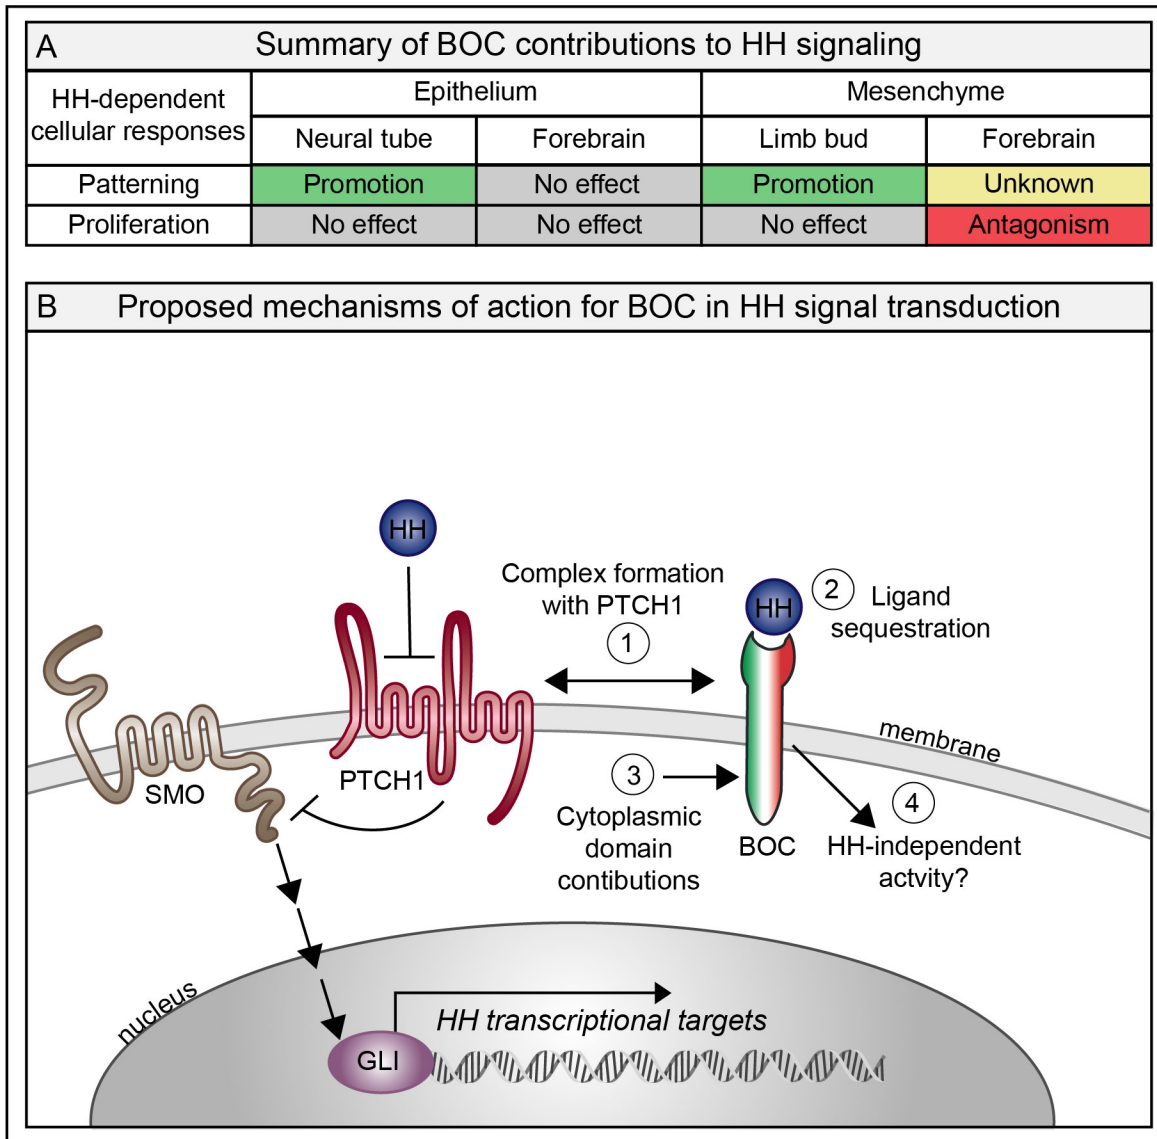

808 Supplemental figure legends

809

810 **Supplemental Figure 1. *Gas1*, *Cdon* and *Boc* are differentially expressed across multiple HH-**  
811 **responsive tissues.**

812 Analysis of HH co-receptor expression using *lacZ* (*Gas1*, *Cdon*) and *hPLAP* (*Boc*) reporter alleles in HH-  
813 responsive tissues (A-O). High magnification pictures of coronal sections of E10.5 telencephala (A-G; cf.  
814 Fig.1Q-T), from wildtype (A, D), *Gas1*<sup>lacZ/+</sup> (B, E), *Cdon*<sup>lacZ/+</sup> (C, F), and *Boc*<sup>AP/+</sup> (D, G) embryos is shown.  
815 E10.5 forebrain neuroepithelia (A-D) and nasal processes (D-G). Arrowhead in (F) denotes a subset of cells  
816 expressing *Cdon* in the olfactory epithelium. Black arrowhead in (G) identifies the extended ventral  
817 expression of *Boc* closer to the source of *Shh* expression. White arrowhead in (G) denotes *Boc* expression in  
818 the olfactory epithelium. Whole mount X-Gal and Alkaline Phosphatase staining of E10.5 forelimb buds (H-  
819 K), wildtype (H), *Gas1*<sup>lacZ/+</sup> (I), *Cdon*<sup>lacZ/+</sup> (J), and *Boc*<sup>AP/+</sup> (K). Transverse sections of E10.5 neural tubes (L-  
820 O), wildtype (L), *Gas1*<sup>lacZ/+</sup> (M), *Cdon*<sup>lacZ/+</sup> (N), and *Boc*<sup>AP/+</sup> (O). Black brackets denote the expression  
821 domain of the HH co-receptors in the neural tube. Double-headed arrow in (N) indicates *Cdon* expression in  
822 the floor plate and notochord. Heat inactivation of endogenous alkaline phosphatase at E10.5 in wildtype (P)  
823 and *Boc*<sup>AP/+</sup> (Q) animals demonstrates the specificity of alkaline phosphatase staining. Somite number (s) is  
824 indicated in the lower right corner (P-Q). Scale bars, (A-G) 100µm, (H-K) 200µm, (L-O) 50µm, (P-Q)  
825 500µm. Abbreviations: surface ectoderm (SE), neuroepithelium (NE), lateral nasal process (LNP), medial  
826 nasal process (MNP), olfactory epithelium (OE).

827

828 **Supplemental Figure 2. Definitions of categories used to quantify telencephalic vesicle division and**  
829 **MNP separation.**

830 En face view of E10.5 embryos (A-C). The telencephalic vesicles are pseudocolored in green and  
831 surrounded by a dotted line. Telencephalic vesicle division classification categories: normal division (A),  
832 incomplete division (B), no division (C). Midface view of E10.5 embryos (D-G). The lateral and medial  
833 nasal processes are pseudocolored in orange and red, respectively, and are surrounded by a dotted line.  
834 Medial nasal process (MNP) classification categories: normal separation (D), reduced separation (E),  
835 incomplete separation (F), and no separation (G). Scale bars (A, D), 500µm.

836

837 **Supplemental Figure 3. *Gas1*, but not *Cdon* or *Boc*, mutant embryos exhibit decreased embryo size at**  
838 **E10.5.**

839 Sagittal views of E10.5 embryos— wildtype (A), *Gas1*<sup>-/-</sup> (B), *Cdon*<sup>-/-</sup>(C), and *Boc*<sup>-/-</sup>(D). Schematic sagittal  
840 view of an E10.5 mouse embryo (E); the red diagonal line denotes crown-rump length. Crown-rump length  
841 quantitation in wildtype (n= 18), *Gas1*<sup>-/-</sup> (n=8), *Cdon*<sup>-/-</sup> (n=7), *Boc*<sup>-/-</sup> (n=27) embryos (F; in µm). Scale bar

842 (A), 500  $\mu\text{m}$ . Data are represented as the mean  $\pm$  standard deviation. P-values were determined by a two-  
843 tailed Student's *t*-test; n.s., not significant.

844

845 **Supplemental Figure 4. The Spectrum of HPE phenotypes correlates with changes in *Gli1* expression.**

846 *In situ* hybridization detection of *Gli1* expression in E10.5 forebrains (A-O). En face views of E10.5  
847 forebrains— wildtype (A-C), *Gas1*<sup>-/-</sup> (D-F), *Cdon*<sup>-/-</sup> (G-I), *Boc*<sup>-/-</sup> (J-L) and *Gas1*<sup>-/-</sup>;*Boc*<sup>-/-</sup> embryos are shown.  
848 Somite number (s) is indicated in the lower right corner of each panel. Black dotted lines outline nasal  
849 processes. Notice that as the HPE phenotypes worsen (from left to right) in *Gas1* and *Cdon* mutants, the  
850 expression of *Gli1* in the MNP is lost. *Boc* mutants display equal levels of *Gli1* in the MNP and do not  
851 display any gross craniofacial defects. *Gas1*;*Boc* double mutants with rescue of the craniofacial defects  
852 (from left to right) maintain the expression of *Gli1* in the MNP, while mutants that do not display the  
853 rescue, the expression of *Gli1* is lost. Scale bars (A-O), 500  $\mu\text{m}$ .

854

855 **Supplemental Figure 5. Reduced Crown-Rump Length in E10.5 *Gas1*;*Boc* double mutant embryos.**

856 Sagittal view of E10.5 wildtype (A), *Gas1*<sup>-/-</sup> (B), *Boc*<sup>-/-</sup> (C), and *Gas1*<sup>-/-</sup>;*Boc*<sup>-/-</sup> (D) embryos. Schematic  
857 sagittal view of an E10.5 mouse embryo; the red diagonal line denotes the crown-rump length (E). Crown-  
858 rump length quantitation (F; in  $\mu\text{m}$ ). Scale bar in (A), 500 $\mu\text{m}$ . Data are represented as mean  $\pm$  standard  
859 deviation. P-values were determined by two tailed Student's *t*-test.

860

861 **Supplemental Figure 6. *Boc* promotes HH-dependent neural patterning in the developing chicken**

862 **forebrain.** Coronal sections of Hamburger-Hamilton stage 21-22 chicken telencephalons electroporated  
863 with empty vector (pCIG; A-D), *SmoM2* (E-H), and *Boc* (I-L). DAPI (grayscale; A,E,I) denotes nuclei.  
864 GFP+ cells (green; B,F,J) identify electroporated cells. Antibody detection of NKX2.1 (red; C,G,K) reads  
865 out HH pathway activity. Merged images are shown in (D,H,L). The number of electroporated embryos that  
866 display ectopic NKX2.1 expression is indicated in the lower right corner (D,H,L). White arrowheads  
867 highlight ectopic NKX2.1 expression. Scale bars in (A), (E), and (I), 50 $\mu\text{m}$ .

868

869 **Supplemental Figure 7. HPE phenotypes and digit specification defects in E18.5 *Gas1*;*Boc* mutant**  
870 **embryos.**

871 En face view of E18.5 *Gas1*<sup>-/-</sup> (A,B) and *Gas1*<sup>-/-</sup>;*Boc*<sup>-/-</sup> (C,D) embryos. Black arrowheads denote the nasal  
872 pits. Three dimensional reconstructions of microCT images of isolated nasal bones from E18.5 *Gas1*<sup>-/-</sup>  
873 (A'B') and *Gas1*<sup>-/-</sup>;*Boc*<sup>-/-</sup> (C',D') embryos. A $\leftarrow$ — $\rightarrow$ P specifies the anterior to posterior axis in (A'-D').  
874 Ventral views of E18.5 cranial vaults from wildtype (E), *Gas1*<sup>-/-</sup> (F), *Boc*<sup>-/-</sup> (G), and *Gas1*<sup>-/-</sup>;*Boc*<sup>-/-</sup> (H)  
875 embryos, stained with alcian blue and alizarin red. Red double arrows denote the cleft palate in *Gas1*<sup>-/-</sup> and  
876 *Gas1*<sup>-/-</sup>;*Boc*<sup>-/-</sup> embryos and black arrowheads mark occipital bone. Inset in H indicates hypoplastic

877 premaxilla in *Gas1*<sup>-/-</sup>;*Boc*<sup>-/-</sup> embryos. Forelimbs of E18.5 wildtype (E'), *Gas1*<sup>-/-</sup> (F'), *Boc*<sup>-/-</sup> (G'), and *Gas1*<sup>-/-</sup>  
878 ;*Boc*<sup>-/-</sup> (H') embryos, stained with alcian blue and alizarin red. Numbers denote specific digits where 1 is the  
879 most anterior and 5 is the most posterior. Insets in F demonstrate variable digit specification phenotypes in  
880 *Gas1*<sup>-/-</sup> embryos, which display either partial fusion of digits two and three (left), or the absence of either  
881 digit two or three (right). *Gas1*<sup>-/-</sup>;*Boc*<sup>-/-</sup> embryos exhibit a more severe limb phenotype where only digits 1  
882 and 5 can be clearly identified; a third, unidentified digit is labeled with a question mark (Allen et al.,  
883 2011). Scale bars (A, A', E, E'), 500 μm.

884

885 **Supplemental Figure 8. *Boc* does not contribute to neural tube or forelimb mesenchyme proliferation.**

886 Immunofluorescent analysis of proliferation in E10.5 neural tube (A-E) and forelimb (F-J) transverse  
887 sections from E10.5, wildtype (A,F), *Gas1*<sup>-/-</sup> (B,G), *Cdon*<sup>-/-</sup> (C,H), *Boc*<sup>-/-</sup> (D,I), and *Gas1*<sup>-/-</sup>;*Boc*<sup>-/-</sup> (E,J)  
888 embryos. Antibody detection of E-CADHERIN (E-CAD, green, F-J), PDGFRα (blue, F-J), and phospho-  
889 histone H3 (PH3, red, A-J). Nuclei are stained with DAPI (blue, A-E). Quantitation of PH3+ cells (2  
890 sections/embryo) in the neural tube (K) and the forelimb bud (L) from E10.5 wildtype (n=6), *Gas1*<sup>-/-</sup> (n=5),  
891 *Boc*<sup>-/-</sup> (n=6) and *Gas1*<sup>-/-</sup>;*Boc*<sup>-/-</sup> (n=4) embryos. Data are presented as mean ± standard deviation. P-values  
892 were determined by two-tailed Student's *t*-test. Scale bars (A,F), 50 μm.

893

Supplemental table S1: List of reagents

| Reagent                            | Vendor                   | Catalog number                                         |
|------------------------------------|--------------------------|--------------------------------------------------------|
| Alcian blue                        | Millipore Sigma          | A5268                                                  |
| Alizarin red                       | Millipore Sigma          | A5533                                                  |
| Alexa Fluor Dyes                   | Thermo Fisher Scientific | A11008, A21147, A21428, A21131, A21240, A21137, A21121 |
| BM purple                          | Roche                    | 11442074001                                            |
| BSA                                | Millipore Sigma          | A7906                                                  |
| DAPI                               | Thermo Fisher Scientific | D1306                                                  |
| EGTA                               | Millipore Sigma          | E3889                                                  |
| Fast green                         | Millipore Sigma          | EM-4510                                                |
| Formaldehyde                       | VWR                      | EMD-FX0410-5                                           |
| Formamide                          | Millipore Sigma          | 4650-500ML                                             |
| Glacial Acetic Acid                | Thermo Fisher Scientific | BP2401-500                                             |
| Glutaraldehyde                     | Millipore Sigma          | G5882                                                  |
| Glycerol                           | VWR                      | EMGX0185-5                                             |
| Goat serum                         | Thermo Fisher Scientific | 16210064                                               |
| Igepal (NP-40)                     | Millipore Sigma          | I8896                                                  |
| Immu-mount                         | Thermo Fisher Scientific | 9990412                                                |
| K <sub>3</sub> Fe(CN) <sub>6</sub> | Millipore Sigma          | PX1455                                                 |
| K <sub>4</sub> Fe(CN) <sub>6</sub> | Millipore Sigma          | P9387                                                  |
| MgCl <sub>2</sub>                  | VWR                      | 0288-500G                                              |
| NaCl                               | Millipore Sigma          | SX0420-3                                               |
| Na deoxycholate                    | VWR                      | SX0480-2                                               |
| OCT                                | Thermo Fisher Scientific | 23730571                                               |
| Paraformaldehyde                   | Thermo Fisher Scientific | 50980489                                               |
| Permunt                            | Thermo Fisher Scientific | SP15100                                                |
| Polyethyleneglycol                 | Millipore Sigma          | 91893-1L-F                                             |
| Potassium hydroxide                | VWR                      | PX1490-1                                               |
| Proteinase K                       | Roche                    | 03115836001                                            |
| Sheep serum                        | Bioworld                 | 30611168-1                                             |
| Tris                               | VWR                      | JT4109-2                                               |
| Triton X-100                       | VWR                      | 9410                                                   |
| Tween-20                           | VWR                      | 9480                                                   |
| X-gal                              | Goldbio                  | X4281C                                                 |
| Xylenes                            | VWR                      | XX00555                                                |



Supplemental Table S2. List of primary antibodies used for immunofluorescence

| Antibody                        | Vendor                               | Catalog number | Dilution |
|---------------------------------|--------------------------------------|----------------|----------|
| Digoxigenin                     | Roche                                | 11 093 274 910 | 1:4,000  |
| NKX2.1 (rabbit IgG)             | Abcam                                | ab76013        | 1:200    |
| E-CADHERIN (mouseIgG2a)         | BD-biosciences                       | 610181         | 1:500    |
| NKX2.2 (mouseIgG2b)             | Developmental Studies Hybridoma Bank | 74.5A5         | 1:20     |
| OLIG2 (rabbit IgG)              | Millipore Sigma                      | AB9610         | 1:2,000  |
| NKX6.1 (mouseIgG1)              | Developmental Studies Hybridoma Bank | F55A10         | 1:20     |
| Phospho-histone H3 (rabbit IgG) | Millipore Sigma                      | 06-570         | 1:1,000  |
| Phospho-histone H3 (mouse IgG1) | Cell Signaling                       | 9706S          | 1:100    |
| PDGFR $\alpha$ (rabbit IgG)     | Cell Signaling                       | 3174S          | 1:100    |

*Gas1*, *Cdon* and *Boc* are differentially expressed across multiple HH-responsive tissues.

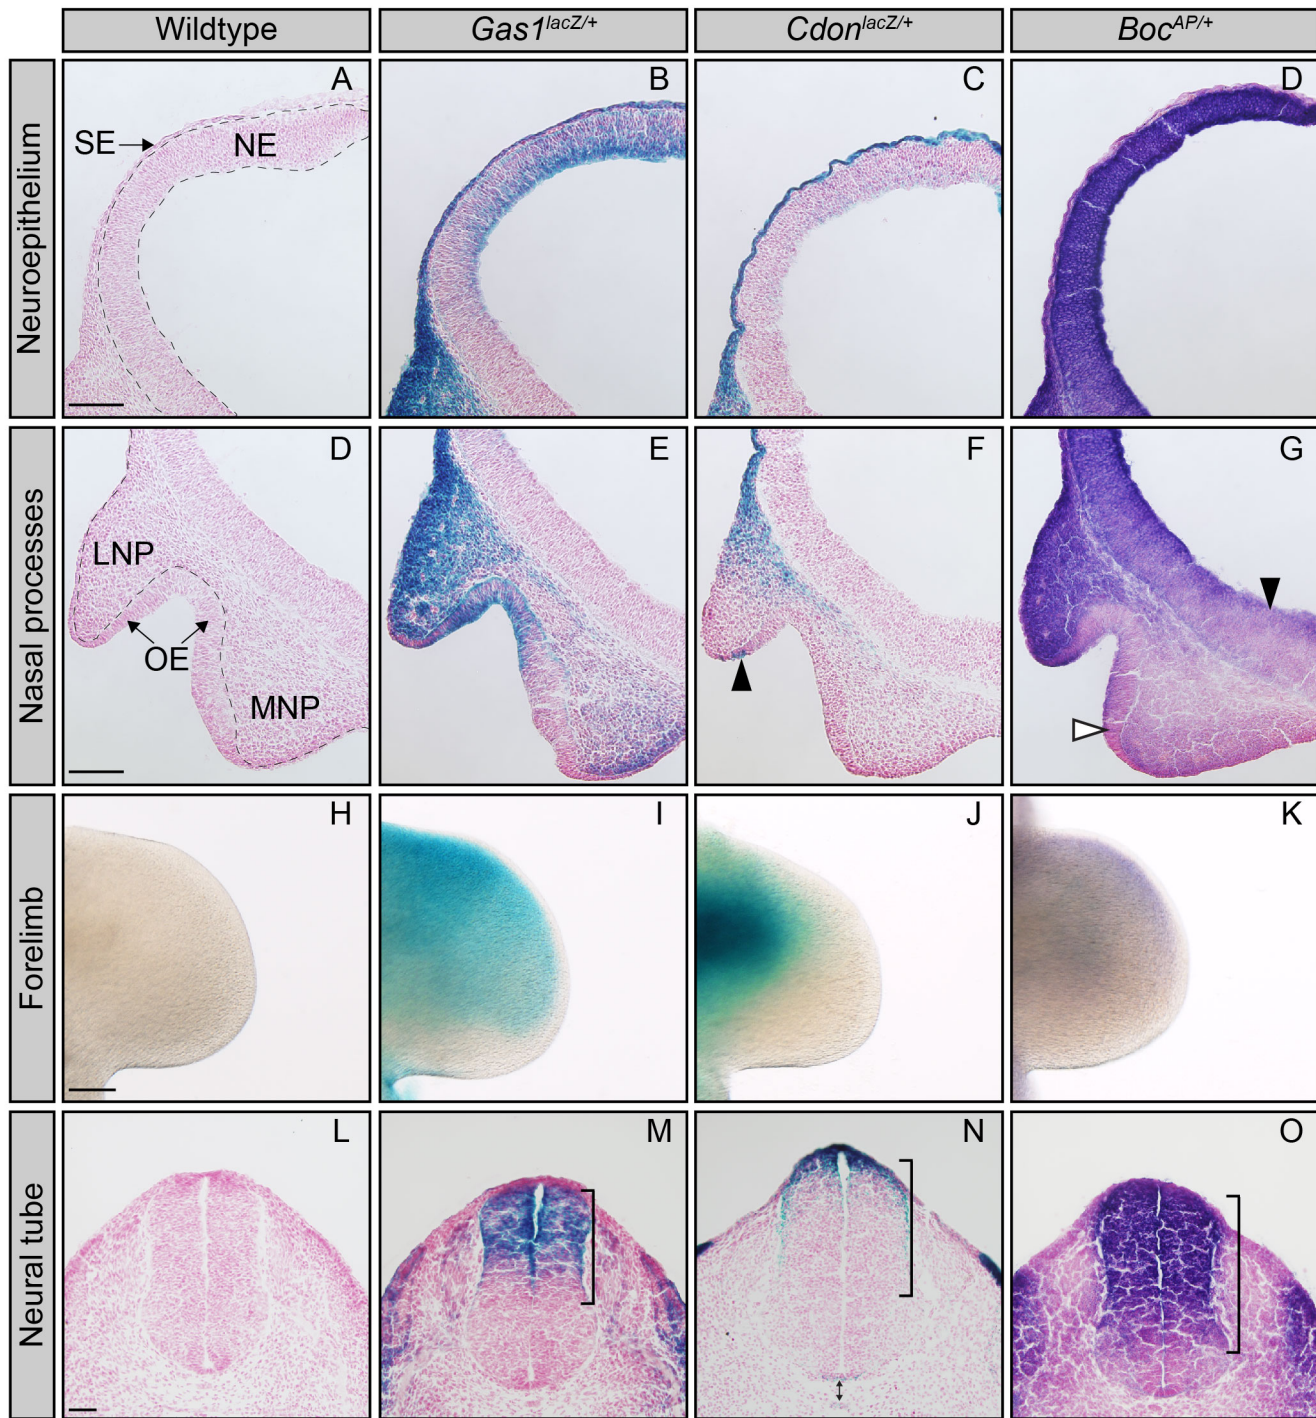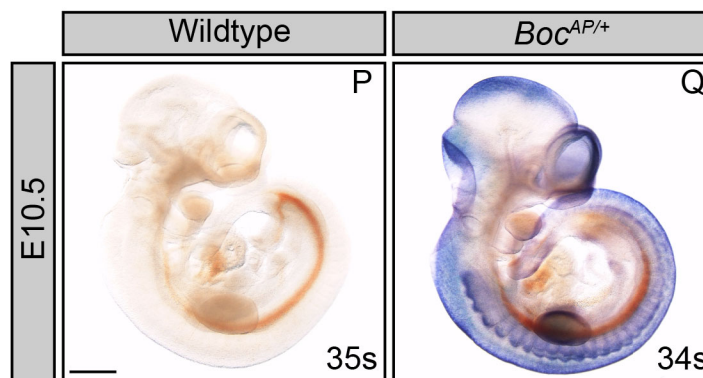

Definitions of categories used to quantify telecephalic vesicle division and MNP separation.

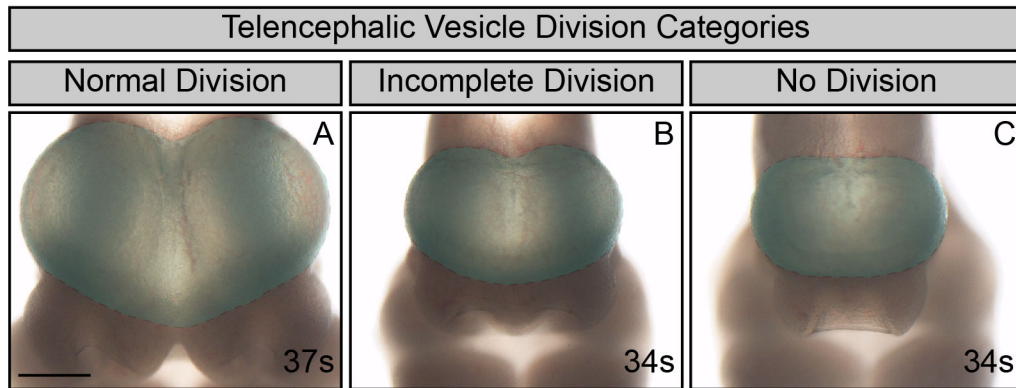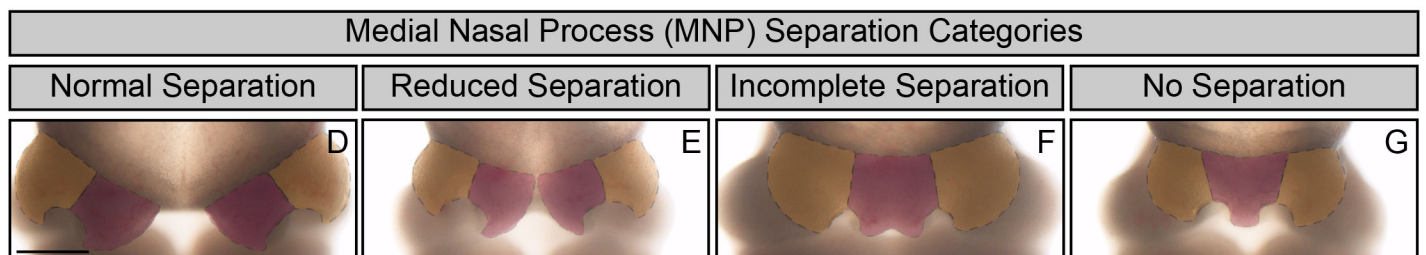

*Gas1*, but not *Cdon* or *Boc*, mutant embryos exhibit decreased embryo size at E10.5.

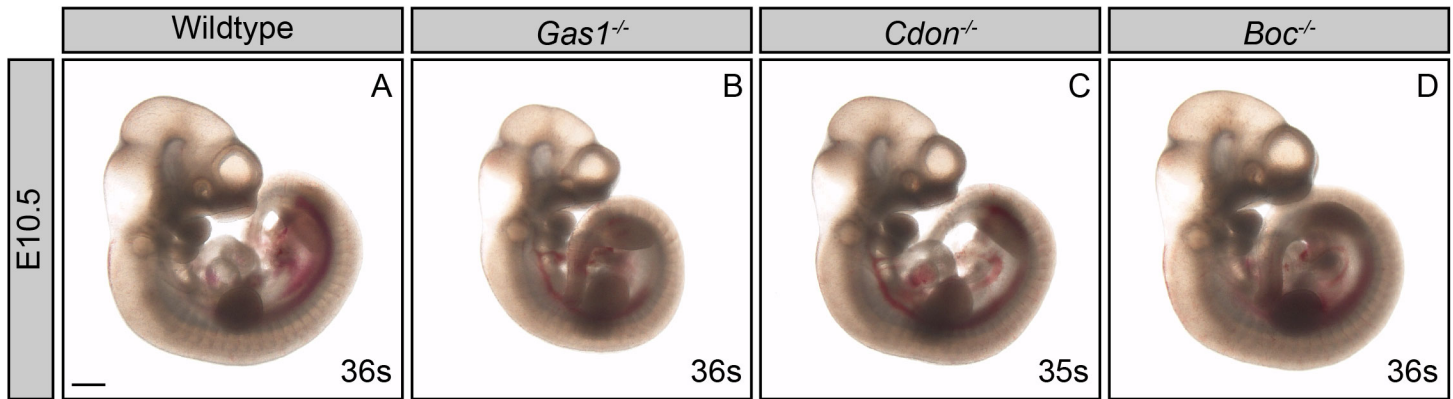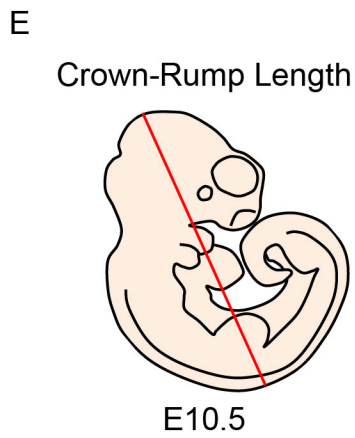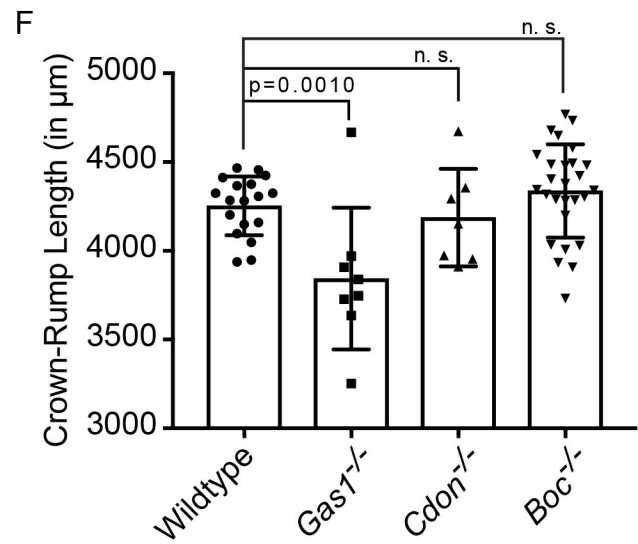



The Spectrum of HPE phenotypes correlates with changes in *Gli1* expression.

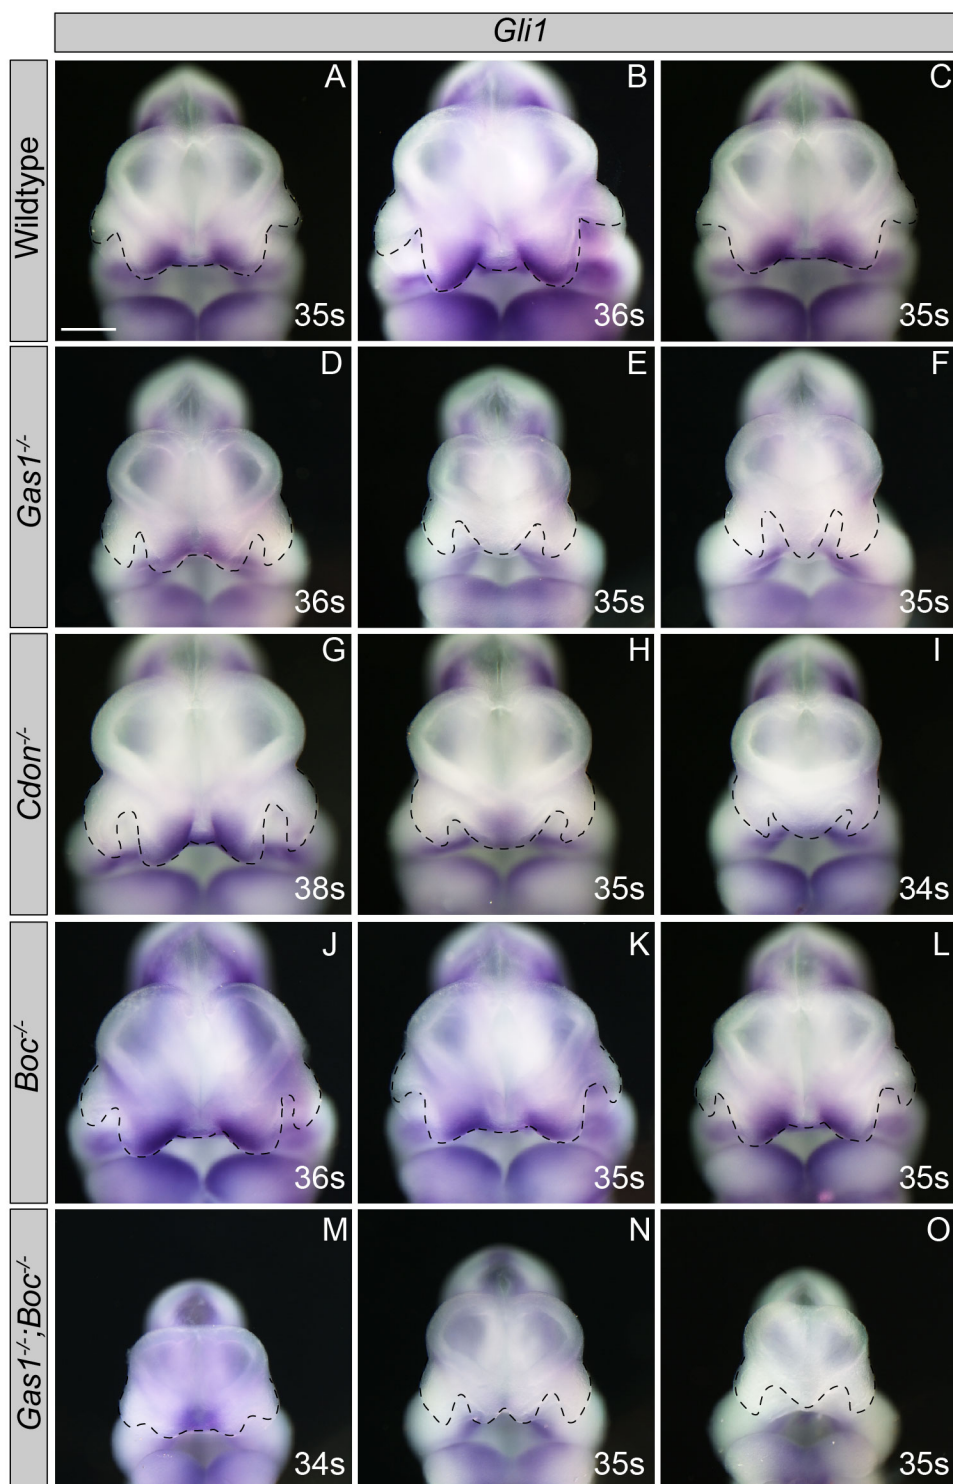



Reduced Crown-Rump Length in E10.5 *Gas1*;*Boc* double mutant embryos.

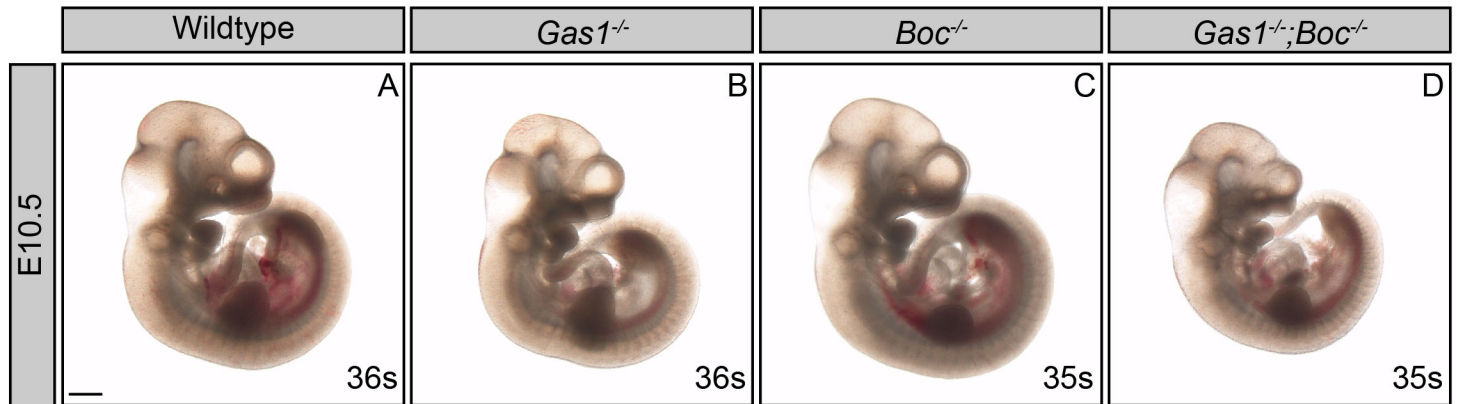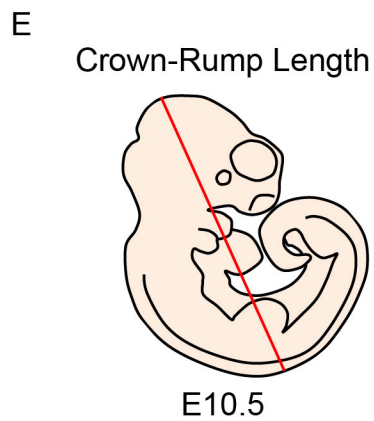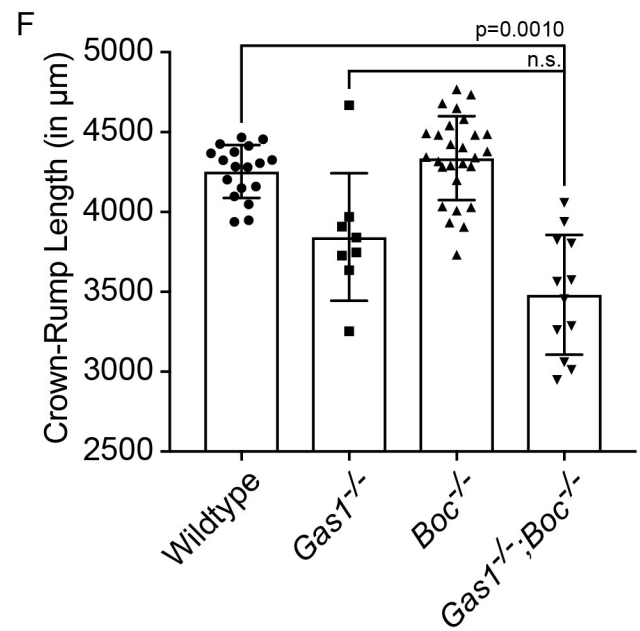

*Boc* promotes HH-dependent neural patterning in the developing chicken forebrain.

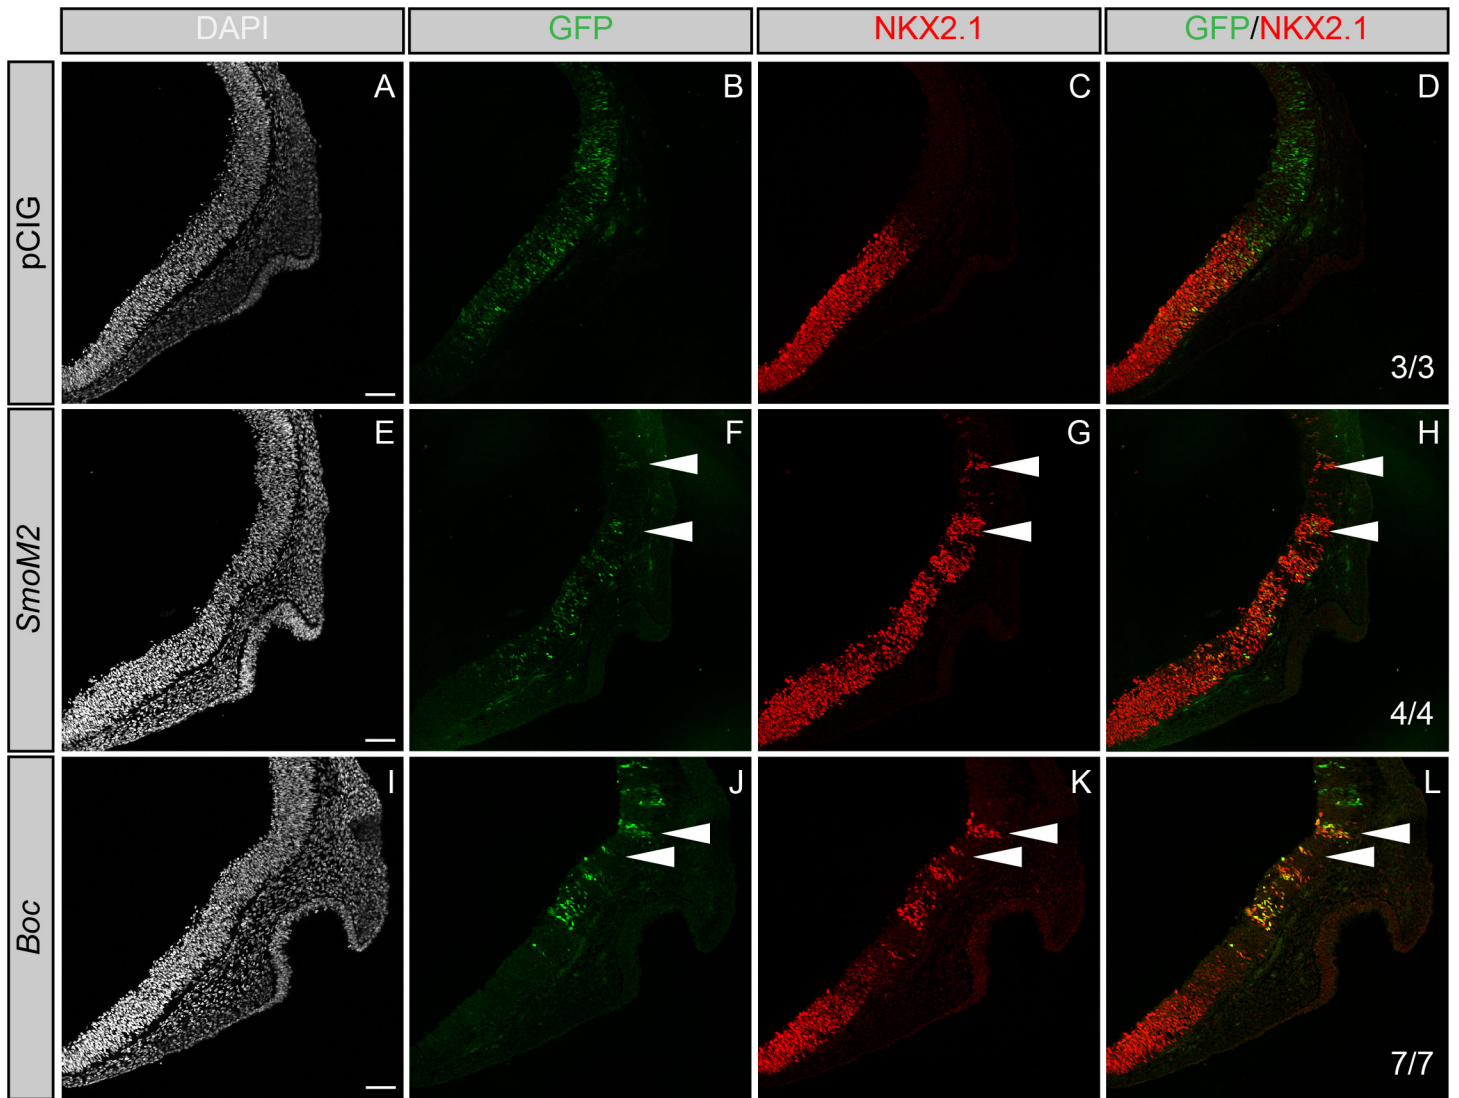

HPE phenotypes and digit specification defects in E18.5 *Gas1*;*Boc* mutant embryos

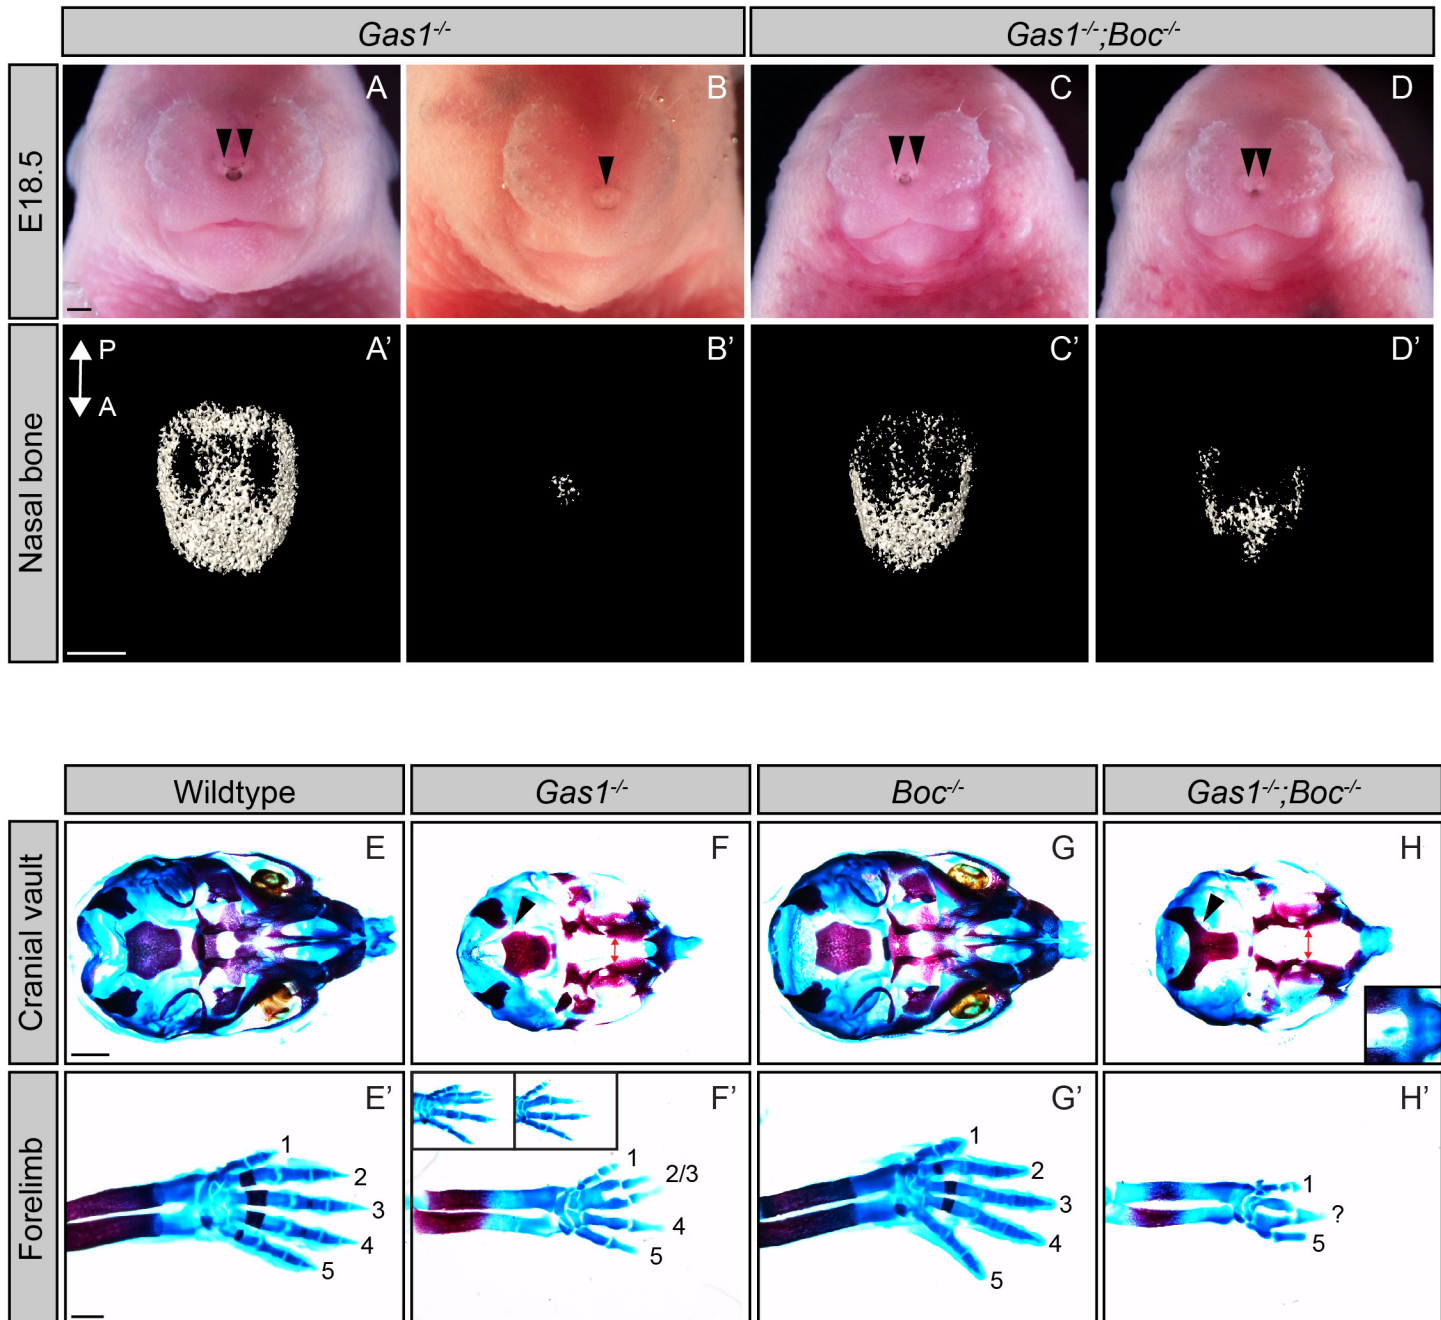



*Boc* does not contribute to neural tube or forelimb mesenchyme proliferation.

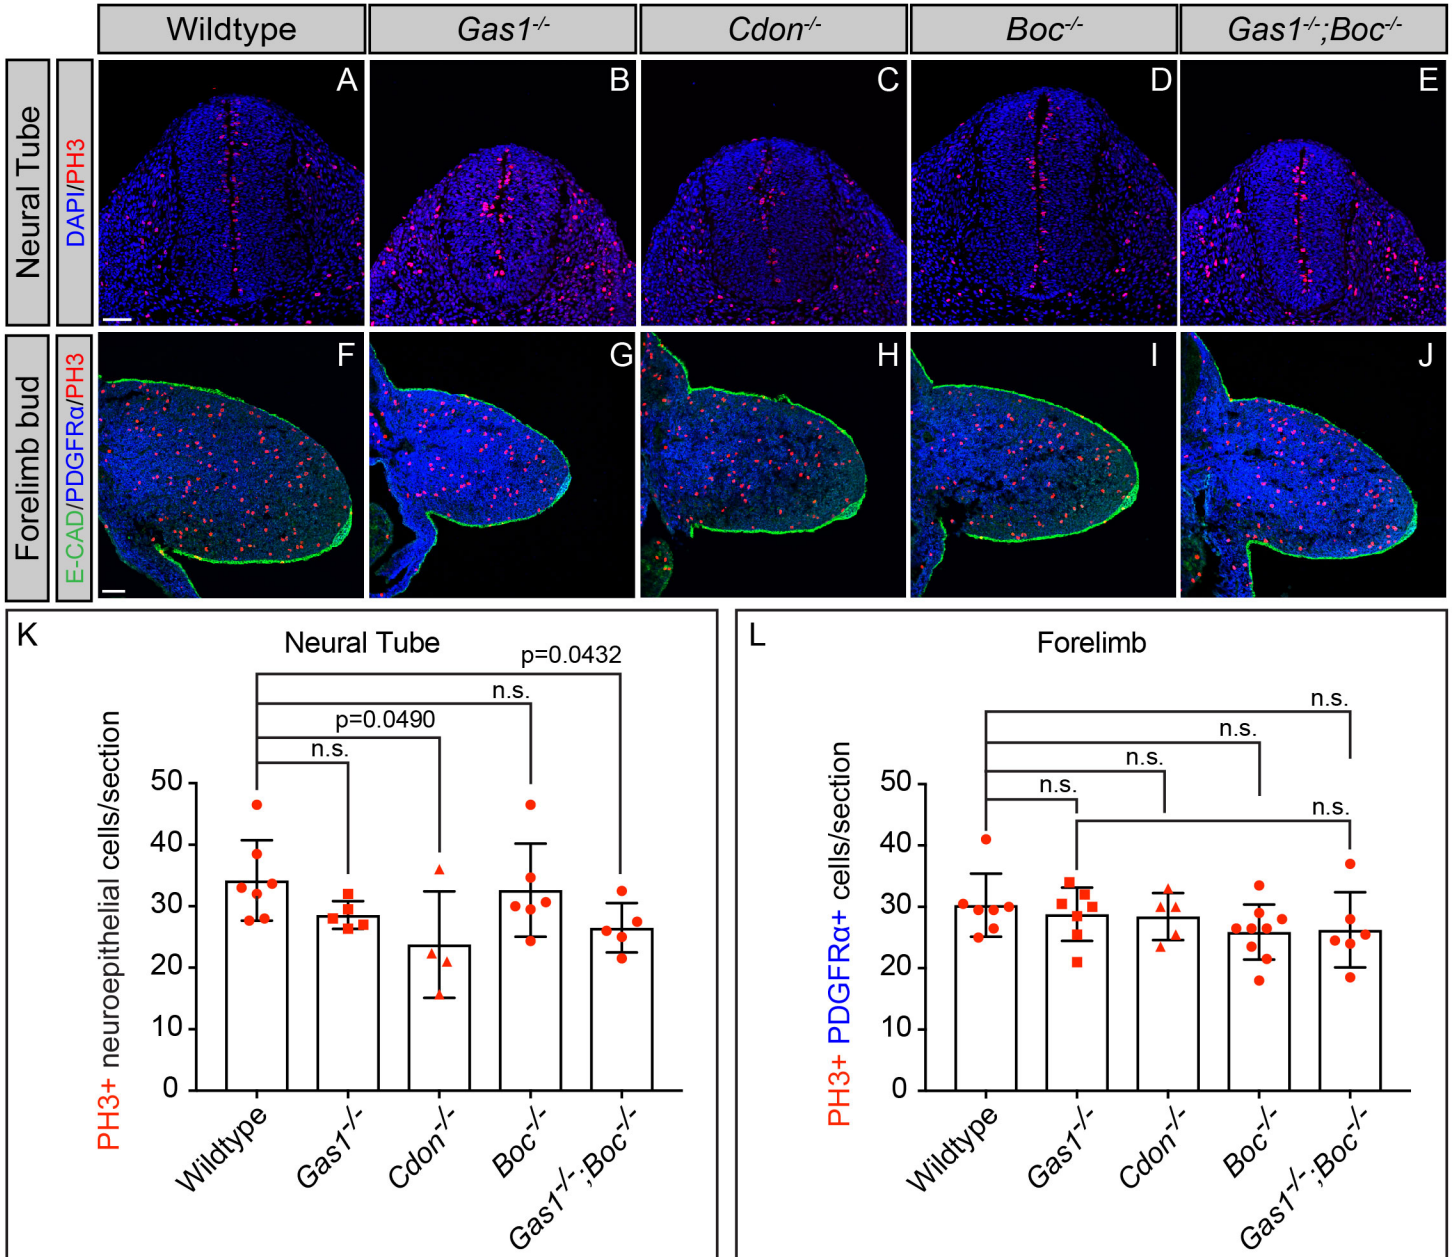

Source: https://www.biorxiv.org/content/10.1101/2020.02.04.934497v1.full.pdf
